# Supplementary material for: New Prediction Model for Probe Specificity in an Allele-Specific Extension Reaction for Haplotype-Specific Extraction (HSE) of Y Chromosome Mixtures
Source: PubMed Central journal article supplement (PMC3457965; doi:10.1371/journal.pone.0045955), 2012-09-25
Supplement: pone.0045955.s003.pdf [file pone.0045955.s003.pdf]

| probe                  | l              | sequence                 | GC% | Tm    | NN     | $\Delta G_M$ | $\Delta G_{MM}$ | $\Delta \Delta G_{M-MM}$ | $con_M^* 10^{-17M}$ | $con_{MM}^* 10^{-17M}$ | $\Delta con_{M-MM}^* 10^{-17M}$ | HSE result in % | SD | n |
|------------------------|----------------|--------------------------|-----|-------|--------|--------------|-----------------|--------------------------|---------------------|------------------------|---------------------------------|-----------------|----|---|
| P30 FG<br>-<br>DYS 439 | 24             | GACAGGTGATAGATAAGTTGATCG | 41  | 63    | -11,11 | -9,96        | -1,15           | 297                      | 285                 | 12                     | -                               |                 |    |   |
|                        | 23             | ACAGGTGATAGATAAGTTGATCG  | 39  | 63    | -10,74 | -9,59        | -1,15           | 295                      | 274                 | 21                     | -                               |                 |    |   |
|                        | 22             | CAGGTGATAGATAAGTTGATCG   | 40  | 61    | -9,51  | -8,36        | -1,15           | 271                      | 187                 | 85                     | 60                              | 1               |    |   |
|                        | 21             | AGGTGATAGATAAGTTGATCG    | 38  | 60    | -9,05  | -7,90        | -1,15           | 247                      | 135                 | 112                    | 76                              | 1               | 2  |   |
|                        | 20             | GGTGATAGATAAGTTGATCG     | 40  | 58    | -8,16  | -7,01        | -1,15           | 165                      | 52                  | 112                    | 70                              |                 | 1  |   |
|                        | 19             | GTGATAGATAAGTTGATCG      | 36  | 55    | -6,90  | -5,70        | -1,20           | 43                       | 8                   | 34                     | 75                              | 8               | 4  |   |
|                        | 18             | TGATAGATAAGTTGATCG       | 33  | 53    | -5,91  | -4,76        | -1,15           | 11                       | 2                   | 9                      | -                               |                 |    |   |
|                        | 17             | GATAGATAAGTTGATCG        | 35  | 52    | -5,60  | -4,41        | -1,19           | 7                        | 1                   | 6                      | 63                              | 19              | 2  |   |
|                        | 16             | ATAGATAAGTTGATCG         | 31  | 50    | -4,92  | -3,87        | -1,05           | 3                        | 1                   | 2                      | -                               |                 |    |   |
|                        | 15             | TAGATAAGTTGATCG          | 33  | 47    | -4,23  | -3,18        | -1,05           | 1                        | 0                   | 1                      | -                               |                 |    |   |
| 14                     | AGATAAGTTGATCG | 35                       | 49  | -4,83 | -3,78  | -1,05        | 2               | 0                        | 2                   | -                      |                                 |                 |    |   |

|                          |                 |                           |    |       |        |       |       |     |     |     |    |   |   |  |
|--------------------------|-----------------|---------------------------|----|-------|--------|-------|-------|-----|-----|-----|----|---|---|--|
| P30 FG-1<br>-<br>DYS 439 | 25              | GACAGGTGATAGATAAGTTGATCGA | 40 | 64    | -11,77 | -9,96 | -1,81 | 299 | 285 | 14  | -  |   |   |  |
|                          | 24              | ACAGGTGATAGATAAGTTGATCGA  | 38 | 64    | -11,4  | -9,59 | -1,81 | 298 | 274 | 24  | -  |   |   |  |
|                          | 23              | CAGGTGATAGATAAGTTGATCGA   | 39 | 62    | -10,17 | -8,36 | -1,81 | 289 | 187 | 102 | -  |   |   |  |
|                          | 22              | AGGTGATAGATAAGTTGATCGA    | 36 | 61    | -9,71  | -7,90 | -1,81 | 278 | 135 | 143 | -  |   |   |  |
|                          | 21              | GGTGATAGATAAGTTGATCGA     | 38 | 60    | -8,81  | -7,01 | -1,80 | 230 | 52  | 177 | 82 | 3 | 4 |  |
|                          | 20              | GTGATAGATAAGTTGATCGA      | 35 | 57    | -7,51  | -5,70 | -1,81 | 93  | 8   | 85  | -  |   |   |  |
|                          | 19              | TGATAGATAAGTTGATCGA       | 32 | 55    | -6,57  | -4,76 | -1,81 | 29  | 2   | 27  | -  |   |   |  |
|                          | 18              | GATAGATAAGTTGATCGA        | 33 | 54    | -6,22  | -4,41 | -1,81 | 18  | 1   | 17  | -  |   |   |  |
|                          | 17              | ATAGATAAGTTGATCGA         | 30 | 52    | -5,57  | -3,87 | -1,70 | 7   | 1   | 6   | -  |   |   |  |
|                          | 16              | TAGATAAGTTGATCGA          | 31 | 49    | -4,79  | -3,18 | -1,61 | 2   | 0   | 2   | -  |   |   |  |
| 15                       | AGATAAGTTGATCGA | 33                        | 51 | -5,38 | -3,78  | -1,60 | 5     | 0   | 5   | -   |    |   |   |  |

|                        |              |                                          |    |       |        |        |       |     |     |    |    |   |   |  |
|------------------------|--------------|------------------------------------------|----|-------|--------|--------|-------|-----|-----|----|----|---|---|--|
| P30 FA<br>-<br>DYS 439 | 40           | TAATAGATAGATGATAGACAGGTGATAGATAAGTTGATCA | 30 | 67    | -16,14 | -15,74 | -0,40 | 300 | 300 | 0  | -  |   |   |  |
|                        | 35           | GATAGATGATAGACAGGTGATAGATAAGTTGATCA      | 34 | 67    | -15,18 | -14,78 | -0,40 | 300 | 300 | 0  | -  |   |   |  |
|                        | 30           | ATGATAGACAGGTGATAGATAAGTTGATCA           | 33 | 66    | -13,22 | -12,82 | -0,40 | 300 | 300 | 0  | -  |   |   |  |
|                        | 28           | GATAGACAGGTGATAGATAAGTTGATCA             | 36 | 64    | -12,1  | -11,7  | -0,40 | 299 | 299 | 1  | -  |   |   |  |
|                        | 26           | TAGACAGGTGATAGATAAGTTGATCA               | 35 | 63    | -10,57 | -10,17 | -0,40 | 294 | 289 | 5  | -  |   |   |  |
|                        | 25           | AGACAGGTGATAGATAAGTTGATCA                | 36 | 64    | -11,16 | -10,76 | -0,40 | 297 | 295 | 2  | -  |   |   |  |
|                        | 24           | GACAGGTGATAGATAAGTTGATCA                 | 38 | 62    | -10,23 | -9,83  | -0,40 | 290 | 282 | 8  | -  |   |   |  |
|                        | 23           | ACAGGTGATAGATAAGTTGATCA                  | 35 | 62    | -9,86  | -9,46  | -0,40 | 282 | 269 | 13 | -  |   |   |  |
|                        | 22           | CAGGTGATAGATAAGTTGATCA                   | 36 | 59    | -8,63  | -8,23  | -0,40 | 214 | 172 | 41 | 76 | 5 | 3 |  |
|                        | 21           | AGGTGATAGATAAGTTGATCA                    | 33 | 58    | -8,17  | -7,77  | -0,40 | 166 | 120 | 45 | 80 | 3 | 2 |  |
|                        | 20           | GGTGATAGATAAGTTGATCA                     | 35 | 56    | -7,28  | -6,88  | -0,40 | 73  | 44  | 28 | 83 | 2 | 3 |  |
|                        | 19           | GTGATAGATAAGTTGATCA                      | 32 | 53    | -5,97  | -5,57  | -0,40 | 13  | 7   | 6  | 75 | 6 | 5 |  |
|                        | 18           | TGATAGATAAGTTGATCA                       | 28 | 51    | -5,03  | -4,63  | -0,40 | 3   | 2   | 1  | -  |   |   |  |
|                        | 17           | GATAGATAAGTTGATCA                        | 29 | 50    | -4,68  | -4,28  | -0,40 | 2   | 1   | 1  | 56 | 6 | 3 |  |
|                        | 16           | ATAGATAAGTTGATCA                         | 25 | 47    | -4,04  | -3,74  | -0,30 | 1   | 0   | 0  | -  |   |   |  |
|                        | 15           | TAGATAAGTTGATCA                          | 27 | 44    | -3,35  | -3,05  | -0,30 | 0   | 0   | 0  | -  |   |   |  |
|                        | 14           | AGATAAGTTGATCA                           | 29 | 46    | -3,95  | -3,65  | -0,30 | 1   | 0   | 0  | -  |   |   |  |
|                        | 13           | GATAAGTTGATCA                            | 31 | 43    | -3,11  | -2,82  | -0,29 | 0   | 0   | 0  | -  |   |   |  |
| 12                     | ATAAGTTGATCA | 25                                       | 38 | -2,84 | -2,55  | -0,29  | 0     | 0   | 0   | -  |    |   |   |  |
| 11                     | TAAGTTGATCA  | 27                                       | 33 | -2,16 | -1,86  | -0,30  | 0     | 0   | 0   | -  |    |   |   |  |
| 10                     | AAGTTGATCA   | 30                                       | 36 | -2,76 | -2,46  | -0,30  | 0     | 0   | 0   | -  |    |   |   |  |
| 8                      | GTTGATCA     | 38                                       | 27 | -1,66 | -1,36  | -0,30  | 0     | 0   | 0   | -  |    |   |   |  |
| 6                      | TGATCA       | 33                                       | 7  | -0,58 | -0,28  | -0,30  | 0     | 0   | 0   | -  |    |   |   |  |

|                             |                      |                              |    |       |        |       |       |     |     |     |    |   |   |
|-----------------------------|----------------------|------------------------------|----|-------|--------|-------|-------|-----|-----|-----|----|---|---|
| P30<br>FA-1<br>-<br>DYS 439 | 25                   | GACAGGTGATAGATAAGTTGATCAA    | 36 | 63    | -10,84 | -9,83 | -1,01 | 296 | 282 | 14  | -  |   |   |
|                             | 24                   | ACAGGTGATAGATAAGTTGATCAA     | 33 | 63    | -10,47 | -9,46 | -1,01 | 293 | 269 | 24  | -  |   |   |
|                             | 23                   | CAGGTGATAGATAAGTTGATCAA      | 35 | 60    | -9,24  | -8,23 | -1,01 | 259 | 172 | 86  | -  |   |   |
|                             | 22                   | AGGTGATAGATAAGTTGATCAA       | 32 | 60    | -8,78  | -7,77 | -1,01 | 227 | 120 | 107 | 95 | 2 | 2 |
|                             | 21                   | GGTGATAGATAAGTTGATCAA        | 33 | 58    | -7,89  | -6,88 | -1,01 | 134 | 44  | 89  | 84 | 5 | 3 |
|                             | 20                   | GTGATAGATAAGTTGATCAA         | 30 | 55    | -6,58  | -5,57 | -1,01 | 30  | 7   | 23  | -  |   |   |
|                             | 19                   | TGATAGATAAGTTGATCAA          | 26 | 52    | -5,64  | -4,63 | -1,01 | 8   | 2   | 6   | -  |   |   |
|                             | 18                   | GATAGATAAGTTGATCAA           | 28 | 52    | -5,29  | -4,28 | -1,01 | 5   | 1   | 4   | -  |   |   |
|                             | 17                   | ATAGATAAGTTGATCAA            | 24 | 49    | -4,65  | -3,74 | -0,91 | 2   | 0   | 1   | -  |   |   |
| 16                          | TAGATAAGTTGATCAA     | 25                           | 46 | -3,86 | -3,05  | -0,81 | 1     | 0   | 0   | -   |    |   |   |
| P30 RC<br>-<br>DYS 439      | 26                   | TTCTATCCATCTATCATCTATTTATC   | 27 | 57    | -7,43  | -6,94 | -0,49 | 86  | 48  | 38  | -  |   |   |
|                             | 25                   | TCTATCCATCTATCATCTATTTATC    | 28 | 57    | -7,55  | -7,06 | -0,49 | 97  | 56  | 42  | 86 | 0 | 2 |
|                             | 24                   | CTATCCATCTATCATCTATTTATC     | 29 | 57    | -7,63  | -7,14 | -0,49 | 106 | 61  | 44  | 92 | 9 | 2 |
|                             | 23                   | TATCCATCTATCATCTATTTATC      | 26 | 54    | -6,02  | -5,53 | -0,49 | 13  | 7   | 7   | -  |   |   |
|                             | 22                   | ATCCATCTATCATCTATTTATC       | 27 | 55    | -6,62  | -6,13 | -0,49 | 31  | 16  | 16  | 51 | 1 | 2 |
|                             | 21                   | TCCATCTATCATCTATTTATC        | 28 | 53    | -5,47  | -4,98 | -0,49 | 6   | 3   | 3   | -  |   |   |
|                             | 20                   | CCATCTATCATCTATTTATC         | 30 | 54    | -6,04  | -5,55 | -0,49 | 14  | 7   | 7   | -  |   |   |
|                             | 19                   | CATCTATCATCTATTTATC          | 26 | 49    | -4,14  | -3,66 | -0,48 | 1   | 0   | 0   | 46 | 8 | 2 |
| 18                          | ATCTATCATCTATTTATC   | 22                           | 47 | -3,56 | -3,07  | -0,49 | 0     | 0   | 0   | -   |    |   |   |
| P30<br>RC-1<br>-<br>DYS 439 | 28                   | ATTCTATCCATCTATCATCTATTTATCG | 29 | 91    | -9,7   | -7,52 | -2,18 | 278 | 94  | 184 | -  |   |   |
|                             | 27                   | TTCTATCCATCTATCATCTATTTATCG  | 30 | 60    | -9,12  | -6,94 | -2,18 | 252 | 48  | 204 | -  |   |   |
|                             | 26                   | TCTATCCATCTATCATCTATTTATCG   | 31 | 60    | -9,24  | -7,06 | -2,18 | 259 | 56  | 203 | 70 | 2 | 3 |
|                             | 25                   | CTATCCATCTATCATCTATTTATCG    | 32 | 60    | -9,32  | -7,14 | -2,18 | 263 | 61  | 201 | -  |   |   |
|                             | 24                   | TATCCATCTATCATCTATTTATCG     | 30 | 57    | -7,71  | -5,53 | -2,18 | 114 | 7   | 107 | -  |   |   |
|                             | 23                   | ATCCATCTATCATCTATTTATCG      | 30 | 59    | -8,31  | -6,13 | -2,18 | 181 | 16  | 165 | 73 | 4 | 3 |
|                             | 22                   | TCCATCTATCATCTATTTATCG       | 32 | 56    | -7,16  | -4,98 | -2,18 | 63  | 3   | 60  | -  |   |   |
|                             | 21                   | CCATCTATCATCTATTTATCG        | 33 | 57    | -7,73  | -5,55 | -2,18 | 116 | 7   | 109 | -  |   |   |
| 20                          | CATCTATCATCTATTTATCG | 30                           | 53 | -5,83 | -3,66  | -2,17 | 10    | 0   | 10  | -   |    |   |   |
| 19                          | ATCTATCATCTATTTATCG  | 26                           | 52 | -5,25 | -3,07  | -2,18 | 4     | 0   | 4   | -   |    |   |   |

| probe                  | l          | sequence                                 | GC % | Tm NN | $\Delta G_M$ | $\Delta G_{MM}$ | $\Delta\Delta G_{M-MM}$ | $con_M^* 10^{-17M}$ | $con_{MM}^* 10^{-17M}$ | $\Delta con_{MM}^* 10^{-17M}$ | HSE result in % | SD | n |
|------------------------|------------|------------------------------------------|------|-------|--------------|-----------------|-------------------------|---------------------|------------------------|-------------------------------|-----------------|----|---|
| P38 FA<br>-<br>DYS 437 | 40         | AGCAGTCTGCCCTGTGGGGGCTGGGAGGGTGGCTCCCGCA | 73   | 90    | -37,29       | -36,69          | -0,60                   | 300                 | 300                    | 0                             | -               |    |   |
|                        | 35         | TCTGCCCTGTGGGGGCTGGGAGGGTGGCTCCCGCA      | 74   | 89    | -32,36       | -31,76          | -0,60                   | 300                 | 300                    | 0                             | -               |    |   |
|                        | 30         | CCTGTGGGGGCTGGGAGGGTGGCTCCCGCA           | 77   | 86    | -27,58       | -26,98          | -0,60                   | 300                 | 300                    | 0                             | -               |    |   |
|                        | 28         | TGTGGGGGCTGGGAGGGTGGCTCCCGCA             | 75   | 84    | -25,17       | -24,57          | -0,60                   | 300                 | 300                    | 0                             | -               |    |   |
|                        | 26         | TGGGGGCTGGGAGGGTGGCTCCCGCA               | 77   | 85    | -23,85       | -23,25          | -0,60                   | 300                 | 300                    | 0                             | -               |    |   |
|                        | 25         | GGGGGCTGGGAGGGTGGCTCCCGCA                | 80   | 84    | -23,50       | -22,89          | -0,61                   | 300                 | 300                    | 0                             | -               |    |   |
|                        | 24         | GGGGCTGGGAGGGTGGCTCCCGCA                 | 79   | 83    | -21,92       | -21,32          | -0,60                   | 300                 | 300                    | 0                             | -               |    |   |
|                        | 23         | GGGCTGGGAGGGTGGCTCCCGCA                  | 78   | 81    | -20,66       | -20,06          | -0,60                   | 300                 | 300                    | 0                             | -               |    |   |
|                        | 22         | GGCTGGGAGGGTGGCTCCCGCA                   | 77   | 80    | -19,40       | -18,80          | -0,60                   | 300                 | 300                    | 0                             | -               |    |   |
|                        | 21         | GCTGGGAGGGTGGCTCCCGCA                    | 76   | 78    | -18,14       | -17,54          | -0,60                   | 300                 | 300                    | 0                             | 89              | 1  |   |
|                        | 20         | CTGGGAGGGTGGCTCCCGCA                     | 75   | 77    | -16,66       | -16,06          | -0,60                   | 300                 | 300                    | 0                             | 87              | 1  |   |
|                        | 19         | TGGGAGGGTGGCTCCCGCA                      | 74   | 74    | -15,49       | -14,88          | -0,61                   | 300                 | 300                    | 0                             | 85              | 6  | 2 |
|                        | 18         | GGGAGGGTGGCTCCCGCA                       | 78   | 75    | -15,42       | -14,82          | -0,60                   | 300                 | 300                    | 0                             | -               |    |   |
|                        | 17         | GGAGGGTGGCTCCCGCA                        | 76   | 72    | -13,84       | -13,24          | -0,60                   | 300                 | 300                    | 0                             | -               |    |   |
|                        | 16         | GAGGGTGGCTCCCGCA                         | 75   | 70    | -12,58       | -12,08          | -0,50                   | 300                 | 299                    | 0                             | 67              | 1  |   |
|                        | 15         | AGGGTGGCTCCCGCA                          | 73   | 71    | -12,36       | -11,86          | -0,50                   | 300                 | 299                    | 0                             | 68              | 6  | 3 |
|                        | 14         | GGGTGGCTCCCGCA                           | 79   | 68    | -11,49       | -10,99          | -0,50                   | 298                 | 297                    | 2                             | -               |    |   |
|                        | 13         | GGTGGCTCCCGCA                            | 77   | 65    | -10,29       | -9,79           | -0,50                   | 291                 | 281                    | 10                            | 54              | 1  |   |
|                        | 12         | GTGGCTCCCGCA                             | 75   | 62    | -9,13        | -8,63           | -0,50                   | 252                 | 214                    | 39                            | 50              | 1  |   |
|                        | 11         | TGGCTCCCGCA                              | 73   | 59    | -8,29        | -7,79           | -0,50                   | 179                 | 123                    | 56                            | 46              | 1  |   |
| 10                     | GGCTCCCGCA | 80                                       | 58   | -8,04 | -7,54        | -0,50           | 151                     | 96                  | 55                     | 50                            | 5               | 2  |   |
| 8                      | CTCCCGCA   | 75                                       | 30   | -5,18 | -4,68        | -0,50           | 4                       | 2                   | 2                      | -                             |                 |    |   |
| 6                      | CCCGCA     | 83                                       | 37   | -4,65 | -4,15        | -0,50           | 2                       | 1                   | 1                      | -                             |                 |    |   |

|                          |    |                      |    |    |        |        |       |     |     |    |    |   |  |
|--------------------------|----|----------------------|----|----|--------|--------|-------|-----|-----|----|----|---|--|
| P38 FA-1<br>-<br>DYS 437 | 20 | TGGGAGGGTGGCTCCCGCAT | 70 | 75 | -15,93 | -14,88 | -1,05 | 300 | 300 | 0  | -  |   |  |
|                          | 19 | GGGAGGGTGGCTCCCGCAT  | 73 | 76 | -15,86 | -14,82 | -1,04 | 300 | 300 | 0  | 86 | 1 |  |
|                          | 18 | GGAGGGTGGCTCCCGCAT   | 72 | 73 | -14,28 | -13,24 | -1,04 | 300 | 300 | 0  | -  |   |  |
|                          | 17 | GAGGGTGGCTCCCGCAT    | 71 | 71 | -13,02 | -12,08 | -0,94 | 300 | 299 | 0  | -  |   |  |
|                          | 16 | AGGGTGGCTCCCGCAT     | 69 | 71 | -12,70 | -11,86 | -0,84 | 300 | 299 | 1  | 79 | 1 |  |
|                          | 15 | GGGTGGCTCCCGCAT      | 73 | 69 | -11,83 | -10,99 | -0,84 | 299 | 297 | 2  | -  |   |  |
|                          | 14 | GGTGGCTCCCGCAT       | 71 | 66 | -10,63 | -9,79  | -0,84 | 294 | 281 | 14 | -  |   |  |
|                          | 13 | GTGGCTCCCGCAT        | 68 | 63 | -9,47  | -8,63  | -0,84 | 270 | 214 | 56 | -  |   |  |
|                          | 12 | TGGCTCCCGCAT         | 67 | 60 | -8,63  | -7,79  | -0,84 | 214 | 123 | 91 | 50 | 1 |  |
|                          | 11 | GGCTCCCGCAT          | 73 | 59 | -8,38  | -7,54  | -0,84 | 189 | 96  | 92 | -  |   |  |

|                        |            |                      |    |       |        |        |       |     |     |     |    |   |   |
|------------------------|------------|----------------------|----|-------|--------|--------|-------|-----|-----|-----|----|---|---|
| P38 FC<br>-<br>DYS 437 | 20         | CTGGGAGGGTGGCTCCCGCC | 80 | 78    | -17,14 | -15,90 | -1,24 | 300 | 300 | 0   | 60 | 1 |   |
|                        | 19         | TGGGAGGGTGGCTCCCGCC  | 78 | 75    | -15,97 | -14,73 | -1,24 | 300 | 300 | 0   | 60 | 1 |   |
|                        | 18         | GGGAGGGTGGCTCCCGCC   | 83 | 76    | -15,90 | -14,66 | -1,24 | 300 | 300 | 0   | 70 | 9 | 4 |
|                        | 17         | GGAGGGTGGCTCCCGCC    | 82 | 73    | -14,32 | -13,08 | -1,24 | 300 | 300 | 0   | -  |   |   |
|                        | 16         | GAGGGTGGCTCCCGCC     | 81 | 71    | -13,07 | -11,93 | -1,14 | 300 | 299 | 1   | -  |   |   |
|                        | 15         | AGGGTGGCTCCCGCC      | 80 | 72    | -12,90 | -11,71 | -1,19 | 300 | 299 | 1   | 72 | 3 | 5 |
|                        | 14         | GGGTGGCTCCCGCC       | 85 | 69    | -11,98 | -10,84 | -1,14 | 299 | 296 | 3   | -  |   |   |
|                        | 13         | GGTGGCTCCCGCC        | 85 | 67    | -10,77 | -9,63  | -1,14 | 295 | 276 | 20  | 60 | 1 |   |
|                        | 12         | GTGGCTCCCGCC         | 83 | 63    | -9,61  | -8,47  | -1,14 | 275 | 198 | 77  | 59 | 1 |   |
|                        | 11         | TGGCTCCCGCC          | 81 | 57    | -7,79  | -7,64  | -0,15 | 226 | 107 | 120 | -  |   |   |
| 10                     | GGCTCCCGCC | 90                   | 56 | -7,54 | -7,39  | -0,15  | 203   | 82  | 121 | 50  | 1  |   |   |
| 9                      | GCTCCCGCC  | 89                   | 48 | -7,05 | -5,91  | -1,14  | 55    | 11  | 44  | -   |    |   |   |

|  |          |          |    |    |       |       |       |   |   |          |   |
|--|----------|----------|----|----|-------|-------|-------|---|---|----------|---|
|  | <b>8</b> | CTCCCGCC | 88 | 46 | -5,66 | -4,52 | -1,14 | 8 | 1 | <b>7</b> | - |
|--|----------|----------|----|----|-------|-------|-------|---|---|----------|---|

|                             |           |                     |    |    |        |        |       |     |     |            |               |
|-----------------------------|-----------|---------------------|----|----|--------|--------|-------|-----|-----|------------|---------------|
| P38<br>FC-1<br>-<br>DYS 437 | <b>19</b> | GGGAGGGTGGCTCCCGCCT | 79 | 78 | -16,70 | -14,66 | -2,04 | 300 | 300 | <b>0</b>   | -             |
|                             | <b>18</b> | GGAGGGTGGCTCCCGCCT  | 78 | 75 | -15,12 | -13,08 | -2,04 | 300 | 300 | <b>0</b>   | <b>49</b> 4 3 |
|                             | <b>17</b> | GAGGGTGGCTCCCGCCT   | 77 | 73 | -13,86 | -11,93 | -1,93 | 300 | 299 | <b>1</b>   | -             |
|                             | <b>16</b> | AGGGTGGCTCCCGCCT    | 75 | 74 | -13,54 | -11,71 | -1,83 | 300 | 299 | <b>1</b>   | -             |
|                             | <b>15</b> | GGGTGGCTCCCGCCT     | 80 | 71 | -12,67 | -10,84 | -1,83 | 300 | 296 | <b>4</b>   | -             |
|                             | <b>14</b> | GGTGGCTCCCGCCT      | 89 | 68 | -11,46 | -9,63  | -1,83 | 298 | 276 | <b>23</b>  | -             |
|                             | <b>13</b> | GTGGCTCCCGCCT       | 77 | 65 | -10,31 | -8,47  | -1,84 | 291 | 198 | <b>93</b>  | -             |
|                             | <b>12</b> | TGGCTCCCGCCT        | 75 | 63 | -9,47  | -7,64  | -1,83 | 270 | 107 | <b>163</b> | <b>39</b> 1   |
|                             | <b>11</b> | GGCTCCCGCCT         | 81 | 62 | -9,22  | -7,39  | -1,83 | 258 | 82  | <b>176</b> | -             |

| probe                 | l  | sequence                                  | GC % | Tm NN | $\Delta G_M$ | $\Delta G_{MM}$ | $\Delta \Delta G_{M-MM}$ | $con_M^* 10^{-17} M$ | $con_{MM}^* 10^{-17} M$ | $\Delta con_{M-MM}^* 10^{-17} M$ | HSE result in % | SD | n  |
|-----------------------|----|-------------------------------------------|------|-------|--------------|-----------------|--------------------------|----------------------|-------------------------|----------------------------------|-----------------|----|----|
|                       | 40 | TACTCTCAGAAATAATTTTCAGAAATGAGTGTGACATCTTC | 33   | 70    | -18,71       | -17,98          | -0,73                    | 300                  | 300                     | 0                                | -               |    |    |
|                       | 39 | ACTCTCAGAAATAATTTTCAGAAATGAGTGTGACATCTTC  | 33   | 70    | -19,11       | -18,38          | -0,73                    | 300                  | 300                     | 0                                | -               |    |    |
|                       | 35 | TCAGAAATAATTTTCAGAAATGAGTGTGACATCTTC      | 31   | 67    | -15,56       | -14,83          | -0,73                    | 300                  | 300                     | 0                                | -               |    |    |
|                       | 34 | CAGAAATAATTTTCAGAAATGAGTGTGACATCTTC       | 32   | 68    | -16,00       | -15,27          | -0,73                    | 300                  | 300                     | 0                                | -               |    |    |
|                       | 33 | AGAAATAATTTTCAGAAATGAGTGTGACATCTTC        | 30   | 67    | -14,78       | -14,05          | -0,73                    | 300                  | 300                     | 0                                | -               |    |    |
|                       | 32 | GAAATAATTTTCAGAAATGAGTGTGACATCTTC         | 31   | 66    | -13,88       | -13,15          | -0,73                    | 300                  | 300                     | 0                                | -               |    |    |
|                       | 31 | AAATAATTTTCAGAAATGAGTGTGACATCTTC          | 29   | 66    | -13,51       | -12,78          | -0,73                    | 300                  | 300                     | 0                                | -               |    |    |
|                       | 30 | AATAATTTTCAGAAATGAGTGTGACATCTTC           | 30   | 66    | -13,15       | -12,42          | -0,73                    | 300                  | 300                     | 0                                | -               |    |    |
|                       | 29 | ATAATTTTCAGAAATGAGTGTGACATCTTC            | 31   | 65    | -12,78       | -12,05          | -0,73                    | 300                  | 299                     | 0                                | -               |    |    |
|                       | 28 | TAATTTTCAGAAATGAGTGTGACATCTTC             | 32   | 64    | -11,89       | -11,16          | -0,73                    | 299                  | 297                     | 2                                | -               |    |    |
|                       | 27 | AATTTTCAGAAATGAGTGTGACATCTTC              | 33   | 65    | -12,49       | -11,76          | -0,73                    | 300                  | 299                     | 1                                | -               |    |    |
|                       | 26 | ATTTTCAGAAATGAGTGTGACATCTTC               | 35   | 65    | -12,16       | -11,43          | -0,73                    | 299                  | 298                     | 1                                | -               |    |    |
|                       | 25 | TTTCAGAAATGAGTGTGACATCTTC                 | 36   | 63    | -10,97       | -10,24          | -0,73                    | 297                  | 290                     | 7                                | -               |    |    |
|                       | 24 | TTCAGAAATGAGTGTGACATCTTC                  | 38   | 63    | -11,09       | -10,36          | -0,73                    | 297                  | 292                     | 6                                | -               |    |    |
| P224FC<br>-<br>DYS390 | 23 | TCAGAAATGAGTGTGACATCTTC                   | 39   | 63    | -10,73       | -9,99           | -0,74                    | 295                  | 285                     | 10                               | 68              | 11 | 4  |
|                       | 22 | CAGAAATGAGTGTGACATCTTC                    | 41   | 63    | -10,80       | -10,07          | -0,73                    | 0                    | 0                       | 0                                | -               |    |    |
|                       | 21 | AGAAATGAGTGTGACATCTTC                     | 38   | 61    | -9,58        | -8,85           | -0,73                    | 274                  | 233                     | 41                               | 85              | 4  | 3  |
|                       | 20 | GAAATGAGTGTGACATCTTC                      | 40   | 59    | -8,69        | -7,95           | -0,74                    | 219                  | 141                     | 79                               | 91              | 5  | 6  |
|                       | 19 | AAATGAGTGTGACATCTTC                       | 37   | 59    | -8,32        | -7,58           | -0,74                    | 182                  | 100                     | 82                               | 89              | 5  | 10 |
|                       | 18 | AATGAGTGTGACATCTTC                        | 39   | 58    | -7,95        | -7,22           | -0,73                    | 141                  | 68                      | 73                               | 91              | 7  | 7  |
|                       | 17 | ATGAGTGTGACATCTTC                         | 41   | 57    | -7,58        | -6,85           | -0,73                    | 100                  | 43                      | 58                               | 88              | 9  | 8  |
|                       | 16 | TGAGTGTGACATCTTC                          | 44   | 54    | -6,40        | -5,77           | -0,63                    | 23                   | 9                       | 14                               | 91              | 7  | 7  |
|                       | 15 | GAGTGTGACATCTTC                           | 47   | 54    | -6,56        | -5,93           | -0,63                    | 29                   | 12                      | 17                               | 92              | 4  | 6  |
|                       | 14 | AGTGTGACATCTTC                            | 43   | 52    | -6,02        | -5,39           | -0,63                    | 13                   | 5                       | 8                                | 86              | 6  | 6  |
|                       | 13 | GTGTGACATCTTC                             | 46   | 49    | -5,15        | -4,52           | -0,63                    | 4                    | 1                       | 2                                | 84              | 6  | 5  |
|                       | 12 | TGTGACATCTTC                              | 42   | 45    | -4,26        | -3,63           | -0,63                    | 1                    | 0                       | 1                                | 70              | 5  | 3  |
|                       | 11 | GTGACATCTTC                               | 45   | 44    | -4,01        | -3,38           | -0,63                    | 1                    | 0                       | 0                                | 79              | 5  | 3  |
|                       | 10 | TGACATCTTC                                | 40   | 36    | -2,85        | -2,22           | -0,63                    | 0                    | 0                       | 0                                | 57              | 6  | 3  |
|                       | 9  | GACATCTTC                                 | 44   | 35    | -2,60        | -1,97           | -0,63                    | 0                    | 0                       | 0                                | 54              | 7  | 3  |
|                       | 8  | ACATCTTC                                  | 38   | 26    | -2,06        | -1,43           | -0,63                    | 0                    | 0                       | 0                                | -               |    |    |
|                       | 6  | CATCTTC                                   | 43   | 21    | -0,93        | -0,32           | -0,61                    | 0                    | 0                       | 0                                | -               |    |    |

|                       |    |                           |    |    |        |        |       |     |     |    |    |   |   |
|-----------------------|----|---------------------------|----|----|--------|--------|-------|-----|-----|----|----|---|---|
|                       | 25 | TTTCAGAAATGAGTGTGACATCTTT | 32 | 63 | -10,92 | -10,22 | -0,70 | 296 | 290 | 7  | -  |   |   |
|                       | 24 | TTCAGAAATGAGTGTGACATCTTT  | 33 | 63 | -11,05 | -10,34 | -0,71 | 297 | 291 | 6  | -  |   |   |
|                       | 23 | TCAGAAATGAGTGTGACATCTTT   | 35 | 63 | -10,68 | -9,98  | -0,70 | 295 | 285 | 10 | 60 | 9 | 5 |
|                       | 22 | CAGAAATGAGTGTGACATCTTT    | 36 | 63 | -10,76 | -10,05 | -0,71 | 295 | 287 | 9  | -  |   |   |
| P224FT<br>-<br>DYS390 | 21 | AGAAATGAGTGTGACATCTTT     | 33 | 61 | -9,53  | -8,83  | -0,70 | 272 | 231 | 41 | 75 | 5 | 3 |
|                       | 20 | GAAATGAGTGTGACATCTTT      | 35 | 59 | -8,64  | -7,94  | -0,70 | 215 | 139 | 75 | 84 | 6 | 5 |
|                       | 19 | AAATGAGTGTGACATCTTT       | 31 | 59 | -8,27  | -7,57  | -0,70 | 177 | 99  | 77 | 86 | 5 | 3 |
|                       | 18 | AATGAGTGTGACATCTTT        | 33 | 58 | -7,91  | -7,20  | -0,71 | 136 | 66  | 70 | 78 | 6 | 3 |
|                       | 17 | ATGAGTGTGACATCTTT         | 35 | 57 | -7,54  | -6,84  | -0,70 | 96  | 42  | 54 | -  |   |   |
|                       | 16 | TGAGTGTGACATCTTT          | 38 | 54 | -6,35  | -5,75  | -0,60 | 22  | 9   | 13 | -  |   |   |

|                       |    |                      |    |    |        |        |       |     |     |    |    |  |   |
|-----------------------|----|----------------------|----|----|--------|--------|-------|-----|-----|----|----|--|---|
| P224RG<br>-<br>DYS390 | 20 | GTGGTTTCAGTCAGCAGGGG | 60 | 68 | -13,00 | -11,71 | -1,29 | 300 | 299 | 1  | 78 |  | 1 |
|                       | 19 | TGGTTTCAGTCAGCAGGGG  | 58 | 67 | -12,03 | -10,72 | -1,31 | 299 | 295 | 4  | -  |  |   |
|                       | 18 | GGTTTCAGTCAGCAGGGG   | 61 | 66 | -11,68 | -10,37 | -1,31 | 299 | 292 | 7  | -  |  |   |
|                       | 17 | GTTTCAGTCAGCAGGGG    | 58 | 63 | -10,10 | -8,79  | -1,31 | 288 | 228 | 60 | 93 |  | 1 |

|                       |           |                  |    |    |       |       |       |     |     |            |   |
|-----------------------|-----------|------------------|----|----|-------|-------|-------|-----|-----|------------|---|
| P224RG<br>-<br>DYS390 | <b>16</b> | TTTCAGTCAGCAGGGG | 56 | 61 | -9,16 | -7,95 | -1,21 | 254 | 141 | <b>114</b> | - |
|                       | <b>15</b> | TTCAGTCAGCAGGGG  | 60 | 61 | -8,97 | -7,76 | -1,21 | 242 | 119 | <b>122</b> | - |
|                       | <b>14</b> | TCAGTCAGCAGGGG   | 64 | 60 | -8,70 | -7,49 | -1,21 | 220 | 91  | <b>129</b> | - |
|                       | <b>13</b> | CAGTCAGCAGGGG    | 69 | 61 | -8,88 | -7,67 | -1,23 | 235 | 110 | <b>125</b> | - |
|                       | <b>12</b> | AGTCAGCAGGGG     | 67 | 57 | -7,76 | -6,55 | -1,25 | 119 | 28  | <b>91</b>  | - |

|                       |           |                      |    |    |        |        |       |     |     |           |           |   |
|-----------------------|-----------|----------------------|----|----|--------|--------|-------|-----|-----|-----------|-----------|---|
| P224RA<br>-<br>DYS390 | <b>20</b> | GTGGTTTCAGTCAGCAGGGA | 55 | 67 | -12,20 | -11,70 | -0,50 | 299 | 299 | <b>1</b>  | <b>66</b> | 1 |
|                       | <b>19</b> | TGGTTTCAGTCAGCAGGGA  | 52 | 65 | -11,19 | -10,71 | -0,48 | 298 | 295 | <b>3</b>  | -         | - |
|                       | <b>18</b> | GGTTTCAGTCAGCAGGGA   | 55 | 65 | -10,84 | -10,36 | -0,48 | 296 | 292 | <b>4</b>  | -         | - |
|                       | <b>17</b> | GTTTCAGTCAGCAGGGA    | 52 | 61 | -9,26  | -8,78  | -0,48 | 260 | 227 | <b>33</b> | <b>86</b> | 1 |
|                       | <b>16</b> | TTTCAGTCAGCAGGGA     | 50 | 59 | -8,32  | -7,94  | -0,38 | 182 | 139 | <b>43</b> | -         | - |
|                       | <b>15</b> | TTCAGTCAGCAGGGA      | 53 | 58 | -8,13  | -7,75  | -0,38 | 161 | 118 | <b>43</b> | -         | - |
|                       | <b>14</b> | TCAGTCAGCAGGGA       | 57 | 58 | -7,86  | -7,49  | -0,37 | 130 | 91  | <b>39</b> | -         | - |

| probe               | I  | sequence                | GC% | Tm | NN    | $\Delta G_M$ | $\Delta G_{MM}$ | $\Delta\Delta G_{M-MM}$ | $con_M^* 10^{-17} M$ | $con_{MM}^* 10^{-17} M$ | $\Delta con_{M-MM}^* 10^{-17} M$ | HSE result in % | SD | n |
|---------------------|----|-------------------------|-----|----|-------|--------------|-----------------|-------------------------|----------------------|-------------------------|----------------------------------|-----------------|----|---|
| P240 FC - DYS 389II | 23 | ATCTTTCAGATCAATAACGTCTC | 34  | 61 | -9,72 | -9,23        | -0,49           | 279                     | 258                  | 20                      | -                                |                 |    |   |
|                     | 22 | TCTTTCAGATCAATAACGTCTC  | 36  | 59 | -8,53 | -8,05        | -0,48           | 204                     | 152                  | 52                      | 82                               | 1               |    |   |
|                     | 21 | CTTTCAGATCAATAACGTCTC   | 38  | 60 | -9,10 | -8,61        | -0,49           | 251                     | 212                  | 39                      | -                                |                 |    |   |
|                     | 20 | TTTCAGATCAATAACGTCTC    | 35  | 57 | -7,32 | -6,83        | -0,49           | 76                      | 42                   | 34                      | -                                |                 |    |   |
|                     | 19 | TTCAGATCAATAACGTCTC     | 36  | 56 | -7,32 | -6,83        | -0,49           | 76                      | 42                   | 34                      | 75                               | 5               | 2  |   |
|                     | 18 | TCAGATCAATAACGTCTC      | 38  | 56 | -6,95 | -6,46        | -0,49           | 49                      | 25                   | 23                      | -                                |                 |    |   |
|                     | 17 | CAGATCAATAACGTCTC       | 41  | 56 | -7,03 | -6,54        | -0,49           | 54                      | 28                   | 26                      | 58                               | 1               |    |   |
|                     | 16 | AGATCAATAACGTCTC        | 37  | 52 | -5,80 | -5,41        | -0,39           | 10                      | 5                    | 4                       | -                                |                 |    |   |

|                       |    |                          |    |    |        |       |       |     |     |     |    |   |   |
|-----------------------|----|--------------------------|----|----|--------|-------|-------|-----|-----|-----|----|---|---|
| P240 FC-1 - DYS 389II | 24 | ATCTTTCAGATCAATAACGTCTCG | 37 | 65 | -11,66 | -9,23 | -2,43 | 299 | 258 | 41  | -  |   |   |
|                       | 23 | TCTTTCAGATCAATAACGTCTCG  | 39 | 62 | -10,47 | -8,05 | -2,42 | 293 | 152 | 141 | -  |   |   |
|                       | 22 | CTTTCAGATCAATAACGTCTCG   | 41 | 64 | -11,04 | -8,61 | -2,43 | 297 | 212 | 85  | -  |   |   |
|                       | 21 | TTTCAGATCAATAACGTCTCG    | 38 | 60 | -9,26  | -6,83 | -2,43 | 260 | 42  | 218 | 82 | 1 |   |
|                       | 20 | TTCAGATCAATAACGTCTCG     | 40 | 61 | -9,26  | -6,83 | -2,43 | 260 | 42  | 218 | 81 | 1 |   |
|                       | 19 | TCAGATCAATAACGTCTCG      | 42 | 60 | -8,89  | -6,46 | -2,43 | 236 | 25  | 211 | 83 | 2 | 3 |
|                       | 18 | CAGATCAATAACGTCTCG       | 44 | 60 | -8,97  | -6,54 | -2,43 | 242 | 28  | 214 | 79 | 1 |   |
|                       | 17 | AGATCAATAACGTCTCG        | 41 | 57 | -7,74  | -5,41 | -2,33 | 117 | 5   | 112 | -  |   |   |

|                     |    |                         |    |    |       |       |       |     |     |    |    |   |   |
|---------------------|----|-------------------------|----|----|-------|-------|-------|-----|-----|----|----|---|---|
| P240 FT - DYS 389II | 23 | ATCTTTCAGATCAATAACGTCTT | 34 | 62 | -9,82 | -9,21 | -0,61 | 281 | 257 | 24 | -  |   |   |
|                     | 22 | TCTTTCAGATCAATAACGTCTT  | 31 | 59 | -8,63 | -8,03 | -0,60 | 214 | 150 | 64 | 84 | 5 | 2 |
|                     | 21 | CTTTCAGATCAATAACGTCTT   | 33 | 60 | -9,20 | -8,60 | -0,60 | 257 | 211 | 46 | -  |   |   |
|                     | 20 | TTTCAGATCAATAACGTCTT    | 30 | 57 | -7,42 | -6,82 | -0,60 | 85  | 41  | 44 | -  |   |   |
|                     | 19 | TTCAGATCAATAACGTCTT     | 32 | 57 | -7,41 | -6,81 | -0,60 | 84  | 40  | 43 | -  |   |   |
|                     | 18 | TCAGATCAATAACGTCTT      | 33 | 56 | -7,04 | -6,44 | -0,60 | 54  | 25  | 30 | -  |   |   |
|                     | 17 | CAGATCAATAACGTCTT       | 35 | 56 | -7,12 | -6,52 | -0,60 | 60  | 27  | 33 | -  |   |   |
|                     | 16 | AGATCAATAACGTCTT        | 31 | 52 | -5,90 | -5,40 | -0,50 | 11  | 5   | 6  | -  |   |   |

|                       |    |                          |    |    |        |       |       |     |     |     |    |   |   |
|-----------------------|----|--------------------------|----|----|--------|-------|-------|-----|-----|-----|----|---|---|
| P240 FT-1 - DYS 389II | 24 | ATCTTTCAGATCAATAACGTCTTG | 33 | 63 | -10,73 | -9,21 | -1,52 | 295 | 257 | 38  | -  |   |   |
|                       | 23 | TCTTTCAGATCAATAACGTCTTG  | 35 | 61 | -9,55  | -8,03 | -1,52 | 273 | 150 | 123 | -  |   |   |
|                       | 22 | CTTTCAGATCAATAACGTCTTG   | 36 | 62 | -10,12 | -8,60 | -1,52 | 288 | 211 | 77  | -  |   |   |
|                       | 21 | TTTCAGATCAATAACGTCTTG    | 33 | 59 | -8,34  | -6,82 | -1,52 | 184 | 41  | 143 | 86 | 1 |   |
|                       | 20 | TTCAGATCAATAACGTCTTG     | 35 | 59 | -8,33  | -6,81 | -1,52 | 183 | 40  | 143 | 94 | 5 | 3 |
|                       | 19 | TCAGATCAATAACGTCTTG      | 37 | 58 | -7,96  | -6,44 | -1,52 | 142 | 25  | 117 | -  |   |   |
|                       | 18 | CAGATCAATAACGTCTTG       | 39 | 58 | -8,04  | -6,52 | -1,52 | 151 | 27  | 123 | -  |   |   |
|                       | 17 | AGATCAATAACGTCTTG        | 35 | 55 | -6,82  | -5,40 | -1,42 | 41  | 5   | 36  | -  |   |   |

|                     |               |                       |    |       |        |       |       |     |     |     |    |   |   |
|---------------------|---------------|-----------------------|----|-------|--------|-------|-------|-----|-----|-----|----|---|---|
| P240 RG - DYS 389II | 21            | GGTAGGCTCAGATAAAGAACG | 47 | 64    | -10,91 | -9,77 | -1,14 | 296 | 280 | 16  | -  |   |   |
|                     | 20            | GTAGGCTCAGATAAAGAACG  | 45 | 61    | -9,34  | -8,19 | -1,15 | 264 | 168 | 96  | 71 | 3 | 2 |
|                     | 19            | TAGGCTCAGATAAAGAACG   | 42 | 59    | -8,40  | -7,25 | -1,15 | 191 | 70  | 121 | 77 | 4 | 3 |
|                     | 18            | AGGCTCAGATAAAGAACG    | 44 | 60    | -8,87  | -7,73 | -1,14 | 234 | 116 | 118 | 79 | 1 | 6 |
|                     | 17            | GGCTCAGATAAAGAACG     | 47 | 58    | -7,94  | -6,79 | -1,15 | 139 | 39  | 100 | 74 | 4 | 2 |
|                     | 16            | GCTCAGATAAAGAACG      | 43 | 55    | -6,63  | -5,59 | -1,04 | 32  | 7   | 25  | 65 | 7 | 3 |
|                     | 15            | CTCAGATAAAGAACG       | 40 | 50    | -5,25  | -4,20 | -1,05 | 4   | 1   | 3   | -  |   |   |
|                     | 14            | TCAGATAAAGAACG        | 35 | 47    | -4,18  | -3,13 | -1,05 | 1   | 0   | 1   | -  |   |   |
| 13                  | CAGATAAAGAACG | 38                    | 48 | -4,72 | -3,67  | -1,05 | 2     | 0   | 2   | -   |    |   |   |

|  |    |                        |    |    |        |       |       |     |     |    |   |  |  |
|--|----|------------------------|----|----|--------|-------|-------|-----|-----|----|---|--|--|
|  | 22 | GGTAGGCTCAGATAAAGAACGA | 45 | 64 | -10,98 | -9,77 | -1,21 | 297 | 280 | 17 | - |  |  |
|--|----|------------------------|----|----|--------|-------|-------|-----|-----|----|---|--|--|

|                                   |    |                       |    |    |       |       |       |     |     |            |           |   |   |
|-----------------------------------|----|-----------------------|----|----|-------|-------|-------|-----|-----|------------|-----------|---|---|
| P240<br>RG-1<br>-<br>DYS<br>389II | 21 | GTAGGCTCAGATAAAGAACGA | 43 | 61 | -9,40 | -8,19 | -1,21 | 267 | 168 | <b>99</b>  | -         |   |   |
|                                   | 20 | TAGGCTCAGATAAAGAACGA  | 40 | 59 | -8,46 | -7,25 | -1,21 | 197 | 70  | <b>127</b> | <b>73</b> | 1 | 2 |
|                                   | 19 | AGGCTCAGATAAAGAACGA   | 42 | 60 | -8,94 | -7,73 | -1,21 | 240 | 116 | <b>124</b> | <b>73</b> | 3 | 2 |
|                                   | 18 | GGCTCAGATAAAGAACGA    | 44 | 58 | -8,00 | -6,79 | -1,21 | 146 | 39  | <b>107</b> | -         |   |   |
|                                   | 17 | GCTCAGATAAAGAACGA     | 41 | 55 | -6,70 | -5,59 | -1,11 | 35  | 7   | <b>28</b>  | -         |   |   |
|                                   | 16 | CTCAGATAAAGAACGA      | 38 | 51 | -5,21 | -4,20 | -1,01 | 4   | 1   | <b>3</b>   | -         |   |   |
|                                   | 15 | TCAGATAAAGAACGA       | 33 | 48 | -4,14 | -3,13 | -1,01 | 1   | 0   | <b>1</b>   | -         |   |   |
|                                   | 14 | CAGATAAAGAACGA        | 36 | 48 | -4,68 | -3,67 | -1,01 | 2   | 0   | <b>1</b>   | -         |   |   |

|                              |            |                                          |    |       |        |        |       |     |          |           |           |   |   |
|------------------------------|------------|------------------------------------------|----|-------|--------|--------|-------|-----|----------|-----------|-----------|---|---|
| P240 RA<br>-<br>DYS<br>389II | 40         | AGTGAAGGAGGGGCTGGCTGGTAGGCTCAGATAAAGAACA | 53 | 80    | -27,74 | -27,34 | -0,40 | 300 | 300      | <b>0</b>  | -         |   |   |
|                              | 35         | AGGAGGGGCTGGCTGGTAGGCTCAGATAAAGAACA      | 54 | 79    | -24,46 | -24,06 | -0,40 | 300 | 300      | <b>0</b>  | -         |   |   |
|                              | 30         | GGGCTGGCTGGTAGGCTCAGATAAAGAACA           | 53 | 75    | -19,57 | -19,18 | -0,39 | 300 | 300      | <b>0</b>  | -         |   |   |
|                              | 28         | GCTGGCTGGTAGGCTCAGATAAAGAACA             | 50 | 72    | -17,06 | -16,66 | -0,40 | 300 | 300      | <b>0</b>  | -         |   |   |
|                              | 24         | GCTGGTAGGCTCAGATAAAGAACA                 | 46 | 67    | -12,76 | -12,36 | -0,40 | 300 | 300      | <b>0</b>  | -         |   |   |
|                              | 23         | CTGGTAGGCTCAGATAAAGAACA                  | 43 | 64    | -11,27 | -10,87 | -0,40 | 298 | 296      | <b>2</b>  | -         |   |   |
|                              | 22         | TGGTAGGCTCAGATAAAGAACA                   | 41 | 62    | -10,10 | -9,70  | -0,40 | 288 | 278      | <b>10</b> | -         |   |   |
|                              | 21         | GGTAGGCTCAGATAAAGAACA                    | 43 | 62    | -10,03 | -9,63  | -0,40 | 286 | 276      | <b>11</b> | <b>66</b> | 6 | 2 |
|                              | 20         | GTAGGCTCAGATAAAGAACA                     | 40 | 59    | -8,45  | -8,06  | -0,39 | 196 | 153      | <b>43</b> | <b>82</b> | 6 | 2 |
|                              | 19         | TAGGCTCAGATAAAGAACA                      | 37 | 57    | -7,51  | -7,12  | -0,39 | 93  | 60       | <b>33</b> | <b>87</b> | 2 | 6 |
|                              | 18         | AGGCTCAGATAAAGAACA                       | 39 | 58    | -7,99  | -7,59  | -0,40 | 145 | 101      | <b>44</b> | <b>88</b> | 1 | 2 |
|                              | 17         | GGCTCAGATAAAGAACA                        | 41 | 56    | -7,06  | -6,66  | -0,40 | 56  | 33       | <b>23</b> | <b>86</b> | 5 | 3 |
|                              | 16         | GCTCAGATAAAGAACA                         | 38 | 52    | -5,75  | -5,45  | -0,30 | 9   | 6        | <b>3</b>  | -         |   |   |
|                              | 15         | CTCAGATAAAGAACA                          | 33 | 48    | -4,37  | -4,07  | -0,30 | 1   | 1        | <b>0</b>  | -         |   |   |
|                              | 14         | TCAGATAAAGAACA                           | 29 | 44    | -3,30  | -3,00  | -0,30 | 0   | 0        | <b>0</b>  | -         |   |   |
|                              | 13         | CAGATAAAGAACA                            | 31 | 44    | -3,84  | -3,54  | -0,30 | 1   | 0        | <b>0</b>  | -         |   |   |
|                              | 12         | AGATAAAGAACA                             | 25 | 39    | -2,71  | -2,42  | -0,29 | 0   | 0        | <b>0</b>  | -         |   |   |
|                              | 11         | GATAAAGAACA                              | 27 | 36    | -1,92  | -1,62  | -0,30 | 0   | 0        | <b>0</b>  | -         |   |   |
| 10                           | ATAAAGAACA | 20                                       | 29 | -1,65 | -1,35  | -0,30  | 0     | 0   | <b>0</b> | -         |           |   |   |
| 8                            | AAAGAACA   | 25                                       | 24 | -1,56 | -1,27  | -0,29  | 0     | 0   | <b>0</b> | -         |           |   |   |
| 6                            | AGAACA     | 33                                       | 7  | -1,07 | -0,81  | -0,26  | 0     | 0   | <b>0</b> | -         |           |   |   |

|                                   |                 |                           |    |       |        |        |       |     |          |           |   |  |  |
|-----------------------------------|-----------------|---------------------------|----|-------|--------|--------|-------|-----|----------|-----------|---|--|--|
| P240<br>RA-1<br>-<br>DYS<br>389II | 25              | GCTGGTAGGCTCAGATAAAGAACAA | 44 | 66    | -12,78 | -12,36 | -0,42 | 300 | 300      | <b>0</b>  | - |  |  |
|                                   | 24              | CTGGTAGGCTCAGATAAAGAACAA  | 42 | 64    | -11,29 | -10,87 | -0,42 | 298 | 296      | <b>2</b>  | - |  |  |
|                                   | 23              | TGGTAGGCTCAGATAAAGAACAA   | 39 | 62    | -10,12 | -9,70  | -0,42 | 288 | 278      | <b>10</b> | - |  |  |
|                                   | 22              | GGTAGGCTCAGATAAAGAACAA    | 41 | 62    | -10,05 | -9,63  | -0,42 | 287 | 276      | <b>11</b> | - |  |  |
|                                   | 21              | GTAGGCTCAGATAAAGAACAA     | 38 | 59    | -8,47  | -8,06  | -0,41 | 198 | 153      | <b>45</b> | - |  |  |
|                                   | 20              | TAGGCTCAGATAAAGAACAA      | 35 | 57    | -7,53  | -7,12  | -0,41 | 95  | 60       | <b>35</b> | - |  |  |
|                                   | 19              | AGGCTCAGATAAAGAACAA       | 37 | 58    | -8,01  | -7,59  | -0,42 | 147 | 101      | <b>46</b> | - |  |  |
|                                   | 18              | GGCTCAGATAAAGAACAA        | 39 | 56    | -7,08  | -6,66  | -0,42 | 57  | 33       | <b>24</b> | - |  |  |
|                                   | 17              | GCTCAGATAAAGAACAA         | 35 | 53    | -5,77  | -5,45  | -0,32 | 9   | 6        | <b>4</b>  | - |  |  |
|                                   | 16              | CTCAGATAAAGAACAA          | 31 | 48    | -4,29  | -4,07  | -0,22 | 1   | 1        | <b>0</b>  | - |  |  |
| 15                                | TCAGATAAAGAACAA | 27                        | 45 | -3,21 | -3,00  | -0,21  | 0     | 0   | <b>0</b> | -         |   |  |  |



| probe                   | I           | sequence                         | GC% | Tm    | NN     | $\Delta G_M$ | $\Delta G_{MM}$ | $\Delta \Delta G_{M-MM}$ | $con_M^* 10^7$<br>17M | $con_{MM}^* 10^7$<br>17M | $\Delta con_{M-MM}^* 10^7$<br>17M | HSE<br>result in<br>% | SD | n |
|-------------------------|-------------|----------------------------------|-----|-------|--------|--------------|-----------------|--------------------------|-----------------------|--------------------------|-----------------------------------|-----------------------|----|---|
| P244 FG<br>-<br>DYS 437 | 40          | CTGGCATTCTAGCGCCCTGCCAGCAGTGCAAC | 65  | 85    | -33,57 | -32,51       | -1,06           | 300                      | 300                   | 0                        | 0                                 | -                     |    |   |
|                         | 35          | ATTCTAGCGCCCTGCCAGCAGTGCAACAGGAC | 63  | 83    | -28,68 | -27,62       | -1,06           | 300                      | 300                   | 0                        | 0                                 | -                     |    |   |
|                         | 30          | AGCGCCCTGCCAGCAGTGCAACAGGACCG    | 70  | 84    | -26,75 | -25,70       | -1,05           | 300                      | 300                   | 0                        | 0                                 | -                     |    |   |
|                         | 28          | CGCCCTGCCAGCAGTGCAACAGGACCG      | 71  | 83    | -24,29 | -23,23       | -1,06           | 300                      | 300                   | 0                        | 0                                 | -                     |    |   |
|                         | 26          | CCCTGCCAGCAGTGCAACAGGACCG        | 69  | 80    | -21,29 | -20,23       | -1,06           | 300                      | 300                   | 0                        | 0                                 | -                     |    |   |
|                         | 25          | CCTGCCAGCAGTGCAACAGGACCG         | 68  | 78    | -20,00 | -18,95       | -1,05           | 300                      | 300                   | 0                        | 0                                 | -                     |    |   |
|                         | 23          | TGCCAGCAGTGCAACAGGACCG           | 65  | 75    | -17,60 | -16,54       | -1,06           | 300                      | 300                   | 0                        | 49                                | 7                     | 2  |   |
|                         | 22          | GCCCAGCAGTGCAACAGGACCG           | 68  | 76    | -17,54 | -16,48       | -1,06           | 300                      | 300                   | 0                        | -                                 | -                     |    |   |
|                         | 21          | CCCAGCAGTGCAACAGGACCG            | 67  | 73    | -15,73 | -14,67       | -1,06           | 300                      | 300                   | 0                        | -                                 | -                     |    |   |
|                         | 20          | CCAGCAGTGCAACAGGACCG             | 65  | 71    | -14,44 | -13,39       | -1,05           | 300                      | 300                   | 0                        | -                                 | -                     |    |   |
|                         | 19          | CAGCAGTGCAACAGGACCG              | 63  | 69    | -13,19 | -12,13       | -1,06           | 300                      | 299                   | 0                        | -                                 | -                     |    |   |
|                         | 18          | AGCAGTGCAACAGGACCG               | 61  | 68    | -12,60 | -11,54       | -1,06           | 300                      | 299                   | 1                        | -                                 | -                     |    |   |
|                         | 17          | GCAGTGCAACAGGACCG                | 65  | 67    | -11,70 | -10,65       | -1,05           | 299                      | 294                   | 4                        | -                                 | -                     |    |   |
|                         | 16          | CAGTGCAACAGGACCG                 | 63  | 64    | -10,17 | -9,21        | -0,96           | 289                      | 257                   | 32                       | 72                                | 4                     | 6  |   |
|                         | 15          | AGTGCAACAGGACCG                  | 60  | 62    | -9,65  | -8,70        | -0,95           | 276                      | 220                   | 56                       | 69                                | 3                     | 2  |   |
|                         | 14          | GTGCAACAGGACCG                   | 64  | 60    | -8,86  | -7,91        | -0,95           | 234                      | 136                   | 97                       | 71                                | 5                     | 3  |   |
|                         | 13          | TGCAACAGGACCG                    | 62  | 58    | -7,97  | -7,02        | -0,95           | 143                      | 53                    | 90                       | 73                                | 6                     | 2  |   |
|                         | 12          | GCAACAGGACCG                     | 67  | 57    | -7,72  | -6,77        | -0,95           | 115                      | 38                    | 77                       | 69                                | 4                     | 2  |   |
| 11                      | CAACAGGACCG | 64                               | 51  | -6,02 | -5,06  | -0,96        | 13              | 3                        | 10                    | 50                       | 4                                 | 3                     |    |   |
| 10                      | AACAGGACCG  | 60                               | 48  | -5,50 | -4,55  | -0,95        | 6               | 2                        | 5                     | -                        | -                                 |                       |    |   |
| 9                       | ACAGGACCG   | 66                               | 46  | -5,32 | -4,36  | -0,96        | 5               | 1                        | 4                     | -                        | -                                 |                       |    |   |
| 8                       | CAGGACCG    | 75                               | 40  | -4,18 | -3,51  | -0,67        | 1               | 0                        | 1                     | -                        | -                                 |                       |    |   |
| 6                       | GGACCG      | 83                               | 28  | -3,08 | -3,08  | 0,00         | 0               | 0                        | 0                     | -                        | -                                 |                       |    |   |

|                              |    |                     |    |    |        |        |       |     |     |     |    |   |   |
|------------------------------|----|---------------------|----|----|--------|--------|-------|-----|-----|-----|----|---|---|
| P244<br>FG-1<br>-<br>DYS 437 | 19 | AGCAGTGCAACAGGACCGG | 63 | 71 | -13,86 | -11,54 | -2,32 | 300 | 299 | 1   | -  |   |   |
|                              | 18 | GCAGTGCAACAGGACCGG  | 66 | 69 | -12,96 | -10,65 | -2,31 | 300 | 294 | 5   | -  |   |   |
|                              | 17 | CAGTGCAACAGGACCGG   | 64 | 66 | -11,43 | -9,21  | -2,22 | 298 | 257 | 41  | -  |   |   |
|                              | 16 | AGTGCAACAGGACCGG    | 62 | 65 | -10,81 | -8,70  | -2,11 | 296 | 220 | 75  | -  |   |   |
|                              | 15 | GTGCAACAGGACCGG     | 66 | 63 | -10,02 | -7,91  | -2,11 | 286 | 136 | 150 | 78 | 1 |   |
|                              | 14 | TGCAACAGGACCGG      | 64 | 61 | -9,13  | -7,02  | -2,11 | 252 | 53  | 199 | 75 | 6 | 2 |
|                              | 13 | GCAACAGGACCGG       | 69 | 61 | -8,88  | -6,77  | -2,11 | 235 | 38  | 197 | 73 | 1 |   |
|                              | 12 | CAACAGGACCGG        | 67 | 55 | -7,17  | -5,06  | -2,11 | 64  | 3   | 60  | -  | - |   |
|                              | 11 | AACAGGACCGG         | 64 | 53 | -6,66  | -4,55  | -2,11 | 33  | 2   | 32  | -  | - |   |

|                         |               |                        |    |       |        |        |      |     |     |    |    |   |   |
|-------------------------|---------------|------------------------|----|-------|--------|--------|------|-----|-----|----|----|---|---|
| P244 FA<br>-<br>DYS 437 | 23            | GCCCAGCAGTGCAACAGGACCA | 61 | 60    | -16,46 | -16,41 | 0,05 | 300 | 300 | 0  | 57 | 1 | 2 |
|                         | 21            | CCCAGCAGTGCAACAGGACCA  | 62 | 71    | -14,54 | -14,59 | 0,05 | 300 | 300 | 0  | -  | - |   |
|                         | 20            | CCAGCAGTGCAACAGGACCA   | 60 | 69    | -13,26 | -13,31 | 0,05 | 300 | 300 | 0  | -  | - |   |
|                         | 19            | CAGCAGTGCAACAGGACCA    | 57 | 67    | -12,00 | -12,05 | 0,05 | 299 | 299 | 0  | -  | - |   |
|                         | 18            | AGCAGTGCAACAGGACCA     | 55 | 66    | -11,41 | -11,46 | 0,05 | 298 | 298 | 0  | -  | - |   |
|                         | 17            | GCAGTGCAACAGGACCA      | 58 | 64    | -10,51 | -10,56 | 0,05 | 293 | 294 | 0  | -  | - |   |
|                         | 16            | CAGTGCAACAGGACCA       | 56 | 61    | -9,03  | -9,08  | 0,05 | 246 | 249 | -3 | 49 | 4 | 2 |
|                         | 15            | AGTGCAACAGGACCA        | 53 | 59    | -8,52  | -8,57  | 0,05 | 203 | 208 | -5 | -  | - |   |
|                         | 14            | GTGCAACAGGACCA         | 57 | 57    | -7,72  | -7,77  | 0,05 | 115 | 120 | -5 | 54 | 6 | 2 |
| 13                      | TGCAACAGGACCA | 53                     | 54 | -6,83 | -6,89  | 0,06   | 42   | 45  | -3  | -  | -  |   |   |

|    |                        |    |    |        |        |       |     |     |   |   |   |  |  |
|----|------------------------|----|----|--------|--------|-------|-----|-----|---|---|---|--|--|
| 22 | CCCAGCAGTGCAACAGGACCAG | 63 | 73 | -15,78 | -14,54 | -1,24 | 300 | 300 | 0 | - | - |  |  |
| 21 | CCAGCAGTGCAACAGGACCAG  | 62 | 71 | -14,49 | -13,26 | -1,23 | 300 | 300 | 0 | - | - |  |  |
| 20 | CAGCAGTGCAACAGGACCAG   | 60 | 69 | -13,23 | -12,00 | -1,23 | 300 | 299 | 1 | - | - |  |  |

|                              |    |                     |    |    |        |        |       |     |     |            |    |   |   |
|------------------------------|----|---------------------|----|----|--------|--------|-------|-----|-----|------------|----|---|---|
| P244<br>FA-1<br>-<br>DYS 437 | 19 | AGCAGTGCAACAGGACCAG | 58 | 68 | -12,64 | -11,41 | -1,23 | 300 | 298 | <b>1</b>   | -  |   |   |
|                              | 18 | GCAGTGCAACAGGACCAG  | 61 | 66 | -11,75 | -10,51 | -1,24 | 299 | 293 | <b>6</b>   | -  |   |   |
|                              | 17 | CAGTGCAACAGGACCAG   | 58 | 63 | -10,22 | -9,08  | -1,14 | 290 | 249 | <b>40</b>  | -  |   |   |
|                              | 16 | AGTGCAACAGGACCAG    | 56 | 62 | -9,60  | -8,57  | -1,03 | 275 | 208 | <b>67</b>  | 73 | 5 | 3 |
|                              | 15 | GTGCAACAGGACCAG     | 60 | 60 | -8,81  | -7,77  | -1,04 | 230 | 120 | <b>109</b> | 76 | 4 | 3 |
|                              | 14 | TGCAACAGGACCAG      | 57 | 58 | -7,92  | -6,89  | -1,03 | 137 | 45  | <b>92</b>  | -  |   |   |

|                         |    |                        |    |    |        |        |       |     |     |           |    |   |   |
|-------------------------|----|------------------------|----|----|--------|--------|-------|-----|-----|-----------|----|---|---|
| P244 RC<br>-<br>DYS 437 | 22 | ATTGTCCTGCAGCTCCATCCCC | 59 |    | -15,11 | -14,36 | -0,75 | 0   | 0   | <b>0</b>  | 54 | 4 | 2 |
|                         | 18 | TCCTGCAGCTCCATCCCC     | 66 | 69 | -12,40 | -11,64 | -0,76 | 300 | 299 | <b>1</b>  | -  |   |   |
|                         | 17 | CCTGCAGCTCCATCCCC      | 70 | 69 | -12,55 | -11,80 | -0,75 | 300 | 299 | <b>1</b>  | -  |   |   |
|                         | 16 | CTGCAGCTCCATCCCC       | 68 | 65 | -10,66 | -10,01 | -0,65 | 295 | 286 | <b>9</b>  | -  |   |   |
|                         | 15 | TGCAGCTCCATCCCC        | 66 | 62 | -9,62  | -8,96  | -0,66 | 275 | 241 | <b>34</b> | 62 |   | 1 |
|                         | 14 | GCAGTCCATCCCC          | 71 | 63 | -9,65  | -9,00  | -0,65 | 276 | 244 | <b>32</b> | 68 |   | 1 |
|                         | 13 | CAGTCCATCCCC           | 69 | 58 | -7,95  | -7,29  | -0,66 | 141 | 73  | <b>67</b> | 63 |   | 1 |
|                         | 12 | AGCTCCATCCCC           | 67 | 56 | -7,43  | -6,78  | -0,65 | 85  | 39  | <b>47</b> | -  |   |   |

|                              |    |                     |    |    |        |        |       |     |     |            |    |   |   |
|------------------------------|----|---------------------|----|----|--------|--------|-------|-----|-----|------------|----|---|---|
| P244<br>RC-1<br>-<br>DYS 437 | 19 | TCCTGCAGCTCCATCCCCG | 68 | 72 | -14,00 | -11,64 | -2,36 | 300 | 299 | <b>1</b>   | -  |   |   |
|                              | 18 | CCTGCAGCTCCATCCCCG  | 72 | 72 | -14,15 | -11,80 | -2,35 | 300 | 299 | <b>1</b>   | -  |   |   |
|                              | 17 | CTGCAGCTCCATCCCCG   | 71 | 68 | -12,26 | -10,01 | -2,25 | 300 | 286 | <b>14</b>  | -  |   |   |
|                              | 16 | TGCAGCTCCATCCCCG    | 69 | 66 | -11,12 | -8,96  | -2,16 | 297 | 241 | <b>56</b>  | -  |   |   |
|                              | 15 | GCAGTCCATCCCCG      | 73 | 66 | -11,15 | -9,00  | -2,15 | 297 | 244 | <b>53</b>  | -  |   |   |
|                              | 14 | CAGTCCATCCCCG       | 71 | 62 | -9,45  | -7,29  | -2,16 | 269 | 73  | <b>195</b> | 71 |   | 1 |
|                              | 13 | AGCTCCATCCCCG       | 69 | 61 | -8,93  | -6,78  | -2,15 | 239 | 39  | <b>200</b> | 69 | 4 | 3 |
|                              | 12 | GCTCCATCCCCG        | 75 | 58 | -8,14  | -5,98  | -2,16 | 162 | 13  | <b>149</b> | -  |   |   |
|                              | 11 | CTCCATCCCCG         | 72 | 53 | -6,70  | -4,55  | -2,15 | 35  | 1   | <b>33</b>  | -  |   |   |

|                         |             |                        |    |       |        |        |       |     |           |           |    |   |   |
|-------------------------|-------------|------------------------|----|-------|--------|--------|-------|-----|-----------|-----------|----|---|---|
| P244 RT<br>-<br>DYS 437 | 22          | ATTGTCCTGCAGCTCCATCCCT | 55 | 72    | -14,93 | -14,24 | -0,69 | 300 | 300       | <b>0</b>  | 52 | 0 | 2 |
|                         | 21          | TTGTCCTGCAGCTCCATCCCT  | 57 | 70    | -13,78 | -13,09 | -0,69 | 300 | 300       | <b>0</b>  |    |   |   |
|                         | 20          | TGTCCTGCAGCTCCATCCCT   | 60 | 70    | -13,90 | -13,21 | -0,69 | 300 | 300       | <b>0</b>  |    |   |   |
|                         | 19          | GTCCTGCAGCTCCATCCCT    | 63 | 71    | -13,47 | -12,79 | -0,68 | 300 | 300       | <b>0</b>  |    |   |   |
|                         | 18          | TCCTGCAGCTCCATCCCT     | 61 | 69    | -12,21 | -11,53 | -0,68 | 299 | 299       | <b>1</b>  | -  |   |   |
|                         | 17          | CCTGCAGCTCCATCCCT      | 64 | 69    | -12,37 | -11,68 | -0,69 | 300 | 299       | <b>1</b>  | -  |   |   |
|                         | 16          | CTGCAGCTCCATCCCT       | 62 | 65    | -10,47 | -9,79  | -0,68 | 293 | 281       | <b>12</b> | 55 | 9 | 5 |
|                         | 15          | TGCAGCTCCATCCCT        | 60 | 62    | -9,43  | -8,74  | -0,69 | 268 | 224       | <b>44</b> | -  |   |   |
|                         | 14          | GCAGTCCATCCCT          | 64 | 62    | -9,47  | -8,78  | -0,69 | 270 | 227       | <b>43</b> | -  |   |   |
|                         | 13          | CAGTCCATCCCT           | 61 | 57    | -7,76  | -7,07  | -0,69 | 119 | 56        | <b>63</b> | 62 | 8 | 4 |
|                         | 12          | AGCTCCATCCCT           | 58 | 55    | -7,25  | -6,56  | -0,69 | 70  | 29        | <b>41</b> | -  |   |   |
| 11                      | GCTCCATCCCT | 63                     | 52 | -6,45 | -5,77  | -0,68  | 25    | 9   | <b>16</b> | 54        |    | 1 |   |
| 10                      | CTCCATCCCT  | 60                     | 45 | -5,02 | -4,33  | -0,69  | 3     | 1   | <b>2</b>  | -         |    |   |   |
| 9                       | TCCATCCCT   | 55                     | 39 | -3,95 | -3,26  | 0,00   | 1     | 0   | <b>0</b>  | -         |    |   |   |

|                              |    |                     |    |    |        |        |       |     |     |            |    |   |   |
|------------------------------|----|---------------------|----|----|--------|--------|-------|-----|-----|------------|----|---|---|
| P244<br>RT-1<br>-<br>DYS 437 | 19 | TCCTGCAGCTCCATCCCTG | 63 | 69 | -12,79 | -11,67 | -1,12 | 300 | 299 | <b>1</b>   | -  |   |   |
|                              | 18 | CCTGCAGCTCCATCCCTG  | 66 | 70 | -12,94 | -11,83 | -1,11 | 300 | 299 | <b>1</b>   | -  |   |   |
|                              | 17 | CTGCAGCTCCATCCCTG   | 65 | 65 | -11,05 | -9,93  | -1,12 | 297 | 284 | <b>13</b>  | -  |   |   |
|                              | 16 | TGCAGCTCCATCCCTG    | 63 | 63 | -9,90  | -8,89  | -1,01 | 283 | 236 | <b>47</b>  | -  |   |   |
|                              | 15 | GCAGTCCATCCCTG      | 67 | 63 | -9,94  | -8,93  | -1,01 | 284 | 239 | <b>45</b>  | -  |   |   |
|                              | 14 | CAGTCCATCCCTG       | 57 | 59 | -8,23  | -7,22  | -1,01 | 172 | 68  | <b>105</b> | 66 | 3 | 4 |
|                              | 13 | AGCTCCATCCCTG       | 62 | 57 | -7,72  | -6,71  | -1,01 | 115 | 35  | <b>80</b>  | -  |   |   |
|                              | 12 | GCTCCATCCCTG        | 67 | 54 | -6,93  | -5,91  | -1,02 | 47  | 11  | <b>36</b>  | -  |   |   |
|                              | 11 | CTCCATCCCTG         | 64 | 48 | -5,49  | -4,48  | -1,01 | 6   | 1   | <b>5</b>   | -  |   |   |

| probe                        | I  | sequence                  | GC% | Tm<br>NN | $\Delta G_M$ | $\Delta G_{MM}$ | $\Delta \Delta G_{M-MM}$ | $con_M^*10^{-17M}$ | $con_{MM}^*10^{-17M}$ | $\Delta con_{M-MM}^*10^{-17M}$ | HSE<br>result in<br>% | SD | n |
|------------------------------|----|---------------------------|-----|----------|--------------|-----------------|--------------------------|--------------------|-----------------------|--------------------------------|-----------------------|----|---|
| 1304202<br>FG<br>-<br>DYS635 | 25 | TATCTAAGGAACATTACTCAAGAGG | 36  | 62       | -10,38       | -8,99           | -1,39                    | 292                | 243                   | 49                             | -                     |    |   |
|                              | 24 | ATCTAAGGAACATTACTCAAGAGG  | 38  | 63       | -10,79       | -9,40           | -1,39                    | 296                | 267                   | 29                             | -                     |    |   |
|                              | 23 | TCTAAGGAACATTACTCAAGAGG   | 39  | 61       | -9,64        | -8,25           | -1,39                    | 276                | 175                   | 101                            | -                     |    |   |
|                              | 22 | CTAAGGAACATTACTCAAGAGG    | 41  | 62       | -10,21       | -8,82           | -1,39                    | 289                | 230                   | 59                             | -                     |    |   |
|                              | 21 | TAAGGAACATTACTCAAGAGG     | 38  | 59       | -8,59        | -7,20           | -1,39                    | 210                | 66                    | 144                            | 75                    | 9  | 2 |
|                              | 20 | AAGGAACATTACTCAAGAGG      | 40  | 61       | -9,19        | -7,80           | -1,39                    | 256                | 124                   | 132                            | -                     |    |   |
|                              | 19 | AGGAACATTACTCAAGAGG       | 42  | 60       | -8,86        | -7,47           | -1,39                    | 234                | 90                    | 144                            | -                     |    |   |
|                              | 18 | GGAACATTACTCAAGAGG        | 44  | 58       | -7,89        | -6,50           | -1,39                    | 134                | 27                    | 107                            | -                     |    |   |
|                              | 17 | GAACATTACTCAAGAGG         | 41  | 55       | -6,58        | -5,19           | -1,39                    | 30                 | 4                     | 26                             | -                     |    |   |
|                              | 16 | AACATTACTCAAGAGG          | 38  | 53       | -6,26        | -4,97           | -1,29                    | 19                 | 3                     | 16                             | -                     |    |   |
|                              | 15 | ACATTACTCAAGAGG           | 40  | 52       | -6,00        | -4,71           | -1,29                    | 13                 | 2                     | 11                             | -                     |    |   |

|                                |                  |                            |    |       |        |       |       |     |     |     |    |    |   |
|--------------------------------|------------------|----------------------------|----|-------|--------|-------|-------|-----|-----|-----|----|----|---|
| 1304202<br>FG-1<br>-<br>DYS635 | 26               | TATCTAAGGAACATTACTCAAGAGGC | 39 | 64    | -11,89 | -9,12 | -2,77 | 299 | 252 | 47  | -  |    |   |
|                                | 25               | ATCTAAGGAACATTACTCAAGAGGC  | 40 | 65    | -12,29 | -9,53 | -2,76 | 300 | 272 | 27  | -  |    |   |
|                                | 24               | TCTAAGGAACATTACTCAAGAGGC   | 42 | 64    | -11,15 | -8,38 | -2,77 | 297 | 189 | 109 | -  |    |   |
|                                | 23               | CTAAGGAACATTACTCAAGAGGC    | 44 | 65    | -11,71 | -8,95 | -2,76 | 299 | 240 | 58  | -  |    |   |
|                                | 22               | TAAGGAACATTACTCAAGAGGC     | 41 | 62    | -10,10 | -7,33 | -2,77 | 288 | 77  | 211 | -  |    |   |
|                                | 21               | AAGGAACATTACTCAAGAGGC      | 43 | 63    | -10,70 | -7,93 | -2,77 | 295 | 138 | 157 | -  |    |   |
|                                | 20               | AGGAACATTACTCAAGAGGC       | 45 | 63    | -10,37 | -7,61 | -2,76 | 292 | 103 | 188 | -  |    |   |
|                                | 19               | GGAACATTACTCAAGAGGC        | 47 | 61    | -9,40  | -6,63 | -2,77 | 267 | 32  | 235 | 81 | 11 | 2 |
|                                | 18               | GAACATTACTCAAGAGGC         | 44 | 58    | -8,09  | -5,32 | -2,77 | 157 | 5   | 152 | -  |    |   |
|                                | 17               | AACATTACTCAAGAGGC          | 41 | 57    | -7,77  | -5,00 | -2,77 | 120 | 3   | 118 | -  |    |   |
| 16                             | ACATTACTCAAGAGGC | 44                         | 56 | -7,41 | -4,74  | -2,67 | 84    | 2   | 82  | -   |    |    |   |

|                              |            |                                          |    |       |        |        |      |     |     |     |    |    |   |
|------------------------------|------------|------------------------------------------|----|-------|--------|--------|------|-----|-----|-----|----|----|---|
| 1304202<br>FA<br>-<br>DYS635 | 40         | ATATTTGAAGAGGTTTATCTAAGGAACATTACTCAAGAGA | 30 | 68    | -16,87 | -17,29 | 0,42 | 300 | 300 | 0   | -  |    |   |
|                              | 35         | TGAAGAGGTTTATCTAAGGAACATTACTCAAGAGA      | 34 | 67    | -15,22 | -15,64 | 0,42 | 300 | 300 | 0   | -  |    |   |
|                              | 30         | AGTTTTATCTAAGGAACATTACTCAAGAGA           | 33 | 65    | -12,45 | -12,86 | 0,41 | 300 | 300 | 0   | -  |    |   |
|                              | 28         | GTTTTATCTAAGGAACATTACTCAAGAGA            | 32 | 61    | -10,17 | -10,59 | 0,42 | 289 | 294 | -5  | -  |    |   |
|                              | 26         | TTATCTAAGGAACATTACTCAAGAGA               | 31 | 60    | -8,94  | -9,35  | 0,41 | 240 | 264 | -25 | -  |    |   |
|                              | 25         | TATCTAAGGAACATTACTCAAGAGA                | 32 | 59    | -8,57  | -8,99  | 0,42 | 208 | 243 | -35 | -  |    |   |
|                              | 24         | ATCTAAGGAACATTACTCAAGAGA                 | 33 | 60    | -8,97  | -9,39  | 0,42 | 242 | 266 | -24 | -  |    |   |
|                              | 23         | TCTAAGGAACATTACTCAAGAGA                  | 35 | 58    | -7,82  | -8,24  | 0,42 | 126 | 173 | -47 | -  |    |   |
|                              | 22         | CTAAGGAACATTACTCAAGAGA                   | 36 | 59    | -8,39  | -8,81  | 0,42 | 190 | 230 | -40 | -  |    |   |
|                              | 21         | TAAGGAACATTACTCAAGAGA                    | 33 | 55    | -6,78  | -7,20  | 0,42 | 39  | 66  | -27 | 73 | 7  | 2 |
|                              | 20         | AAGGAACATTACTCAAGAGA                     | 35 | 57    | -7,38  | -7,80  | 0,42 | 81  | 124 | -43 | 72 | 4  | 2 |
|                              | 19         | AGGAACATTACTCAAGAGA                      | 37 | 56    | -7,05  | -7,47  | 0,42 | 55  | 90  | -34 | 77 | 11 | 4 |
|                              | 18         | GGAACATTACTCAAGAGA                       | 39 | 53    | -6,07  | -6,49  | 0,42 | 14  | 26  | -12 | 70 | 13 | 3 |
|                              | 17         | GAACATTACTCAAGAGA                        | 35 | 49    | -4,77  | -5,19  | 0,42 | 2   | 4   | -2  | -  |    |   |
|                              | 16         | AACATTACTCAAGAGA                         | 31 | 48    | -4,55  | -4,97  | 0,42 | 2   | 3   | -1  | -  |    |   |
|                              | 15         | ACATTACTCAAGAGA                          | 33 | 46    | -4,28  | -4,70  | 0,42 | 1   | 2   | -1  | -  |    |   |
|                              | 14         | CATTACTCAAGAGA                           | 36 | 43    | -3,15  | -3,57  | 0,42 | 0   | 0   | 0   | -  |    |   |
|                              | 13         | ATTACTCAAGAGA                            | 31 | 39    | -2,79  | -3,21  | 0,42 | 0   | 0   | 0   | -  |    |   |
|                              | 12         | TACTCAAGAGA                              | 33 | 29    | -1,92  | -2,34  | 0,42 | 0   | 0   | 0   | -  |    |   |
|                              | 11         | TACTCAAGAGA                              | 36 | 33    | -2,01  | -2,43  | 0,42 | 0   | 0   | 0   | -  |    |   |
| 10                           | ACTCAAGAGA | 40                                       | 32 | -2,51 | -2,93  | 0,42   | 0    | 0   | 0   | -   |    |    |   |

|   |          |    |    |       |       |      |   |   |   |   |
|---|----------|----|----|-------|-------|------|---|---|---|---|
| 8 | TCAAGAGA | 38 | 16 | -0,51 | -0,93 | 0,42 | 0 | 0 | 0 | - |
|---|----------|----|----|-------|-------|------|---|---|---|---|

|                                |               |                         |    |       |        |       |       |     |     |     |         |
|--------------------------------|---------------|-------------------------|----|-------|--------|-------|-------|-----|-----|-----|---------|
| 1304202<br>FA-1<br>-<br>DYS635 | 26            | TATCTAAGGAACACTCAAGAGAC | 34 | 62    | -10,54 | -8,99 | -1,55 | 294 | 243 | 50  | -       |
|                                | 25            | ATCTAAGGAACACTCAAGAGAC  | 36 | 63    | -10,95 | -9,39 | -1,56 | 296 | 266 | 30  | -       |
|                                | 24            | TCTAAGGAACACTCAAGAGAC   | 38 | 61    | -9,80  | -8,24 | -1,56 | 281 | 173 | 107 | -       |
|                                | 23            | CTAAGGAACACTCAAGAGAC    | 39 | 62    | -10,37 | -8,81 | -1,56 | 292 | 230 | 62  | -       |
|                                | 22            | TAAGGAACACTCAAGAGAC     | 36 | 60    | -8,75  | -7,20 | -1,55 | 225 | 66  | 159 | 76 8 2  |
|                                | 21            | AAGGAACACTCAAGAGAC      | 38 | 61    | -9,35  | -7,80 | -1,55 | 264 | 124 | 141 | -       |
|                                | 20            | AGGAACACTCAAGAGAC       | 40 | 60    | -9,02  | -7,47 | -1,55 | 245 | 90  | 156 | 73 10 2 |
|                                | 19            | GGAACACTCAAGAGAC        | 42 | 58    | -8,05  | -6,49 | -1,56 | 152 | 26  | 126 | -       |
|                                | 18            | GAACACTCAAGAGAC         | 39 | 55    | -6,74  | -5,19 | -1,55 | 37  | 4   | 33  | -       |
|                                | 17            | AACACTCAAGAGAC          | 35 | 54    | -6,42  | -4,97 | -1,45 | 24  | 3   | 21  | -       |
| 16                             | ACACTCAAGAGAC | 38                      | 53 | -6,06 | -4,70  | -1,36 | 14    | 2   | 12  | -   |         |

|                              |             |                                         |    |       |        |        |       |     |     |     |         |
|------------------------------|-------------|-----------------------------------------|----|-------|--------|--------|-------|-----|-----|-----|---------|
| 1304202<br>RC<br>-<br>DYS635 | 40          | GAATTCATTAGCTGAATTAGTTTTATTTATGGAGGAAGC | 30 | 69    | -17,97 | -16,80 | -1,17 | 300 | 300 | 0   | -       |
|                              | 35          | TCATTAGCTGAATTAGTTTTATTTATGGAGGAAGC     | 31 | 68    | -15,80 | -14,64 | -1,16 | 300 | 300 | 0   | -       |
|                              | 30          | AGCTGAATTAGTTTTATTTATGGAGGAAGC          | 33 | 67    | -14,08 | -12,91 | -1,17 | 300 | 300 | 0   | -       |
|                              | 28          | CTGAATTAGTTTTATTTATGGAGGAAGC            | 32 | 64    | -11,61 | -10,44 | -1,17 | 299 | 292 | 6   | -       |
|                              | 26          | GAATTAGTTTTATTTATGGAGGAAGC              | 31 | 62    | -10,37 | -9,20  | -1,17 | 292 | 257 | 35  | -       |
|                              | 25          | AATTAGTTTTATTTATGGAGGAAGC               | 28 | 61    | -9,73  | -8,56  | -1,17 | 279 | 207 | 72  | -       |
|                              | 24          | ATTAGTTTTATTTATGGAGGAAGC                | 29 | 60    | -9,36  | -8,20  | -1,16 | 265 | 169 | 96  | -       |
|                              | 23          | TTAGTTTTATTTATGGAGGAAGC                 | 30 | 58    | -8,10  | -6,94  | -1,16 | 158 | 48  | 110 | -       |
|                              | 22          | TAGTTTTATTTATGGAGGAAGC                  | 32 | 59    | -8,30  | -7,13  | -1,17 | 180 | 61  | 119 | -       |
|                              | 21          | AGTTTTATTTATGGAGGAAGC                   | 33 | 59    | -8,70  | -7,53  | -1,17 | 220 | 95  | 125 | 70 1    |
|                              | 20          | GTTTTATTTATGGAGGAAGC                    | 35 | 58    | -7,77  | -6,60  | -1,17 | 120 | 31  | 90  | -       |
|                              | 19          | TTTTATTTATGGAGGAAGC                     | 32 | 55    | -6,78  | -5,61  | -1,17 | 39  | 7   | 32  | 62 15 3 |
|                              | 18          | TTTATTTATGGAGGAAGC                      | 33 | 54    | -6,49  | -5,32  | -1,17 | 26  | 5   | 21  | 61 6 2  |
|                              | 17          | TTATTTATGGAGGAAGC                       | 35 | 53    | -6,12  | -4,95  | -1,17 | 16  | 3   | 13  | -       |
|                              | 16          | TATTTATGGAGGAAGC                        | 38 | 52    | -5,75  | -4,68  | -1,07 | 9   | 2   | 7   | -       |
|                              | 15          | ATTTATGGAGGAAGC                         | 40 | 53    | -6,25  | -5,19  | -1,06 | 19  | 4   | 15  | -       |
|                              | 14          | TTTATGGAGGAAGC                          | 43 | 50    | -5,21  | -4,14  | -1,07 | 4   | 1   | 3   | -       |
|                              | 13          | TTATGGAGGAAGC                           | 46 | 50    | -5,43  | -4,36  | -1,07 | 6   | 1   | 5   | -       |
|                              | 12          | TATGGAGGAAGC                            | 50 | 48    | -5,16  | -4,10  | -1,06 | 4   | 1   | 3   | -       |
| 11                           | ATGGAGGAAGC | 55                                      | 49 | -5,67 | -4,60  | -1,07  | 8     | 2   | 6   | -   |         |
| 10                           | TGGAGGAAGC  | 60                                      | 45 | -4,62 | -3,55  | -1,07  | 2     | 0   | 1   | -   |         |
| 8                            | GAGGAAGC    | 63                                      | 35 | -3,31 | -2,24  | -1,07  | 0     | 0   | 0   | -   |         |
| 6                            | GGAAGC      | 67                                      | 24 | -2,22 | -1,15  | -1,07  | 0     | 0   | 0   | -   |         |

|                                |    |                                          |    |    |        |        |       |     |     |     |         |
|--------------------------------|----|------------------------------------------|----|----|--------|--------|-------|-----|-----|-----|---------|
| 1304202<br>RC-1<br>-<br>DYS635 | 40 | GAATTCATTAGCTGAATTAGTTTTATTTATGGAGGAAGCC | 32 | 70 | -19,27 | -16,80 | -2,47 | 300 | 300 | 0   | -       |
|                                | 35 | TCATTAGCTGAATTAGTTTTATTTATGGAGGAAGCC     | 33 | 69 | -17,10 | -14,64 | -2,46 | 300 | 300 | 0   | -       |
|                                | 30 | AGCTGAATTAGTTTTATTTATGGAGGAAGCC          | 35 | 68 | -15,37 | -12,91 | -2,46 | 300 | 300 | 0   | -       |
|                                | 28 | CTGAATTAGTTTTATTTATGGAGGAAGCC            | 34 | 65 | -12,90 | -10,44 | -2,46 | 300 | 292 | 7   | -       |
|                                | 26 | AATTAGTTTTATTTATGGAGGAAGCC               | 31 | 63 | -11,02 | -8,56  | -2,46 | 297 | 207 | 90  | -       |
|                                | 25 | ATTAGTTTTATTTATGGAGGAAGCC                | 32 | 63 | -10,66 | -8,20  | -2,46 | 295 | 169 | 126 | -       |
|                                | 24 | TTAGTTTTATTTATGGAGGAAGCC                 | 33 | 61 | -9,40  | -6,94  | -2,46 | 267 | 48  | 219 | 74 17 2 |
|                                | 23 | TAGTTTTATTTATGGAGGAAGCC                  | 35 | 61 | -9,59  | -7,13  | -2,46 | 274 | 61  | 214 | -       |
|                                | 22 | AGTTTTATTTATGGAGGAAGCC                   | 36 | 62 | -9,99  | -7,53  | -2,46 | 285 | 95  | 190 | -       |
|                                | 21 | GTTTTATTTATGGAGGAAGCC                    | 38 | 60 | -9,06  | -6,60  | -2,46 | 248 | 31  | 217 | 81 8 2  |

|         |    |                      |    |    |       |       |       |     |   |            |           |   |
|---------|----|----------------------|----|----|-------|-------|-------|-----|---|------------|-----------|---|
|         | 20 | TTTTATTTATGGAGGAAGCC | 35 | 58 | -8,07 | -5,61 | -2,46 | 154 | 7 | <b>147</b> | <b>77</b> | 1 |
|         | 19 | TTTATTTATGGAGGAAGCC  | 37 | 57 | -7,78 | -5,32 | -2,46 | 122 | 5 | <b>117</b> | <b>77</b> | 1 |
|         | 18 | TTATTTATGGAGGAAGCC   | 39 | 57 | -7,41 | -4,95 | -2,46 | 84  | 3 | <b>81</b>  | -         |   |
|         | 17 | TATTTATGGAGGAAGCC    | 41 | 56 | -7,04 | -4,68 | -2,36 | 54  | 2 | <b>53</b>  | -         |   |
|         | 16 | ATTTATGGAGGAAGCC     | 44 | 57 | -7,45 | -5,19 | -2,26 | 88  | 4 | <b>84</b>  | -         |   |
|         | 15 | ATTTATGGAGGAAGCC     | 44 | 57 | -7,45 | -5,19 | -2,26 | 88  | 4 | <b>84</b>  | -         |   |
| 1304202 | 14 | TTTATGGAGGAAGCC      | 47 | 54 | -6,40 | -4,14 | -2,26 | 23  | 1 | <b>22</b>  | -         |   |
| RC-1    | 13 | TTATGGAGGAAGCC       | 50 | 54 | -6,62 | -4,36 | -2,26 | 31  | 1 | <b>30</b>  | -         |   |
| -       | 12 | TATGGAGGAAGCC        | 54 | 53 | -6,36 | -4,10 | -2,26 | 22  | 1 | <b>21</b>  | -         |   |
| DYS635  | 11 | ATGGAGGAAGCC         | 58 | 54 | -6,86 | -4,60 | -2,26 | 43  | 2 | <b>42</b>  | -         |   |
|         | 10 | TGGAGGAAGCC          | 64 | 50 | -5,81 | -3,55 | -2,26 | 10  | 0 | <b>10</b>  | -         |   |
|         | 8  | GAGGAAGCC            | 67 | 43 | -4,50 | -2,24 | -2,26 | 1   | 0 | <b>1</b>   | -         |   |
|         | 6  | GGAAGCC              | 71 | 34 | -3,41 | -1,70 | -1,71 | 0   | 0 | <b>0</b>   | -         |   |

| probe                  | l  | sequence               | GC% | Tm<br>NN | $\Delta G_M$ | $\Delta G_{MM}$ | $\Delta\Delta G_{M-MM}$ | $con_M^* 10^7$<br>17M | $con_{MM}^* 10^7$<br>17M | $\Delta con_{M-MM}^* 10^7$<br>17M | HSE result<br>in % | SD | n |
|------------------------|----|------------------------|-----|----------|--------------|-----------------|-------------------------|-----------------------|--------------------------|-----------------------------------|--------------------|----|---|
| Tat FT<br>-<br>DYS 438 | 23 | TGAGGTAGACTTGTGAATTCAT | 34  | 61,6     | -9,95        | -9,38           | -0,57                   | 285                   | 266                      | 19                                | -                  |    |   |
|                        | 22 | GAGGTAGACTTGTGAATTCAT  | 36  | 61,6     | -9,89        | -9,32           | -0,57                   | 283                   | 263                      | 20                                | -                  |    |   |
|                        | 21 | AGGTAGACTTGTGAATTCAT   | 33  | 60,6     | -9,25        | -8,68           | -0,57                   | 259                   | 218                      | 41                                | -                  |    |   |
|                        | 20 | GTGTAGACTTGTGAATTCAT   | 35  | 58,5     | -8,28        | -7,71           | -0,57                   | 178                   | 114                      | 64                                | 77                 | 4  | 3 |
|                        | 19 | TGTAGACTTGTGAATTCAT    | 31  | 56,2     | -7,29        | -6,72           | -0,57                   | 73                    | 36                       | 37                                | -                  |    |   |
|                        | 18 | GTAGACTTGTGAATTCAT     | 33  | 55,5     | -6,94        | -6,37           | -0,57                   | 48                    | 22                       | 26                                | -                  |    |   |
|                        | 17 | TAGACTTGTGAATTCAT      | 29  | 51,8     | -5,68        | -5,11           | -0,57                   | 8                     | 3                        | 5                                 | -                  |    |   |
|                        | 16 | AGACTTGTGAATTCAT       | 31  | 52,9     | -6,15        | -5,69           | -0,46                   | 16                    | 8                        | 8                                 | -                  |    |   |

|                        |    |                       |    |      |        |       |       |     |     |    |    |   |   |
|------------------------|----|-----------------------|----|------|--------|-------|-------|-----|-----|----|----|---|---|
| Tat FC<br>-<br>DYS 438 | 22 | GAGGTAGACTTGTGAATTCAC | 41 | 61,7 | -10,01 | -9,49 | -0,52 | 286 | 270 | 15 | -  |   |   |
|                        | 21 | AGGTAGACTTGTGAATTCAC  | 38 | 60,8 | -9,37  | -8,85 | -0,52 | 263 | 230 | 34 | -  |   |   |
|                        | 20 | GTGTAGACTTGTGAATTCAC  | 40 | 58,8 | -8,40  | -7,87 | -0,53 | 191 | 132 | 59 | 85 | 7 | 2 |
|                        | 19 | TGTAGACTTGTGAATTCAC   | 37 | 56,6 | -7,41  | -6,89 | -0,52 | 84  | 45  | 39 | -  |   |   |
|                        | 18 | GTAGACTTGTGAATTCAC    | 38 | 55,8 | -7,06  | -6,54 | -0,52 | 56  | 28  | 28 | 87 | 1 | 3 |
|                        | 17 | TAGACTTGTGAATTCAC     | 35 | 52,3 | -5,80  | -5,27 | -0,53 | 10  | 4   | 5  | -  |   |   |
|                        | 16 | AGACTTGTGAATTCAC      | 38 | 53,4 | -6,27  | -5,85 | -0,42 | 19  | 11  | 9  | -  |   |   |
|                        | 15 | GACTTGTGAATTCAC       | 40 | 51,2 | -5,44  | -5,02 | -0,42 | 6   | 3   | 3  | -  |   |   |

| probe                            | l  | sequence                | GC% | T <sub>m</sub><br>NN | ΔG <sub>M</sub> | ΔG <sub>MM</sub> | ΔΔG <sub>M-MM</sub> | con <sub>M</sub> * 10 <sup>-17</sup><br>M | con <sub>MM</sub> *<br>10 <sup>-17</sup> M | Δcon <sub>M-MM</sub> * 10 <sup>-17</sup><br>M | HSE<br>result in<br>% | SD | n |
|----------------------------------|----|-------------------------|-----|----------------------|-----------------|------------------|---------------------|-------------------------------------------|--------------------------------------------|-----------------------------------------------|-----------------------|----|---|
| Seq.E<br>2071 RG<br>-<br>DYS 437 | 23 | AGGCTGTGCTATTGATGAAAATG | 39  | 67,1                 | -13,01          | -11,81           | -1,20               | 300                                       | 299                                        | 1                                             | 67                    |    | 1 |
|                                  | 21 | GCTGTGCTATTGATGAAAATG   | 41  | 65,5                 | -12,07          | -10,88           | -1,19               | 299                                       | 296                                        | 3                                             | -                     |    |   |
|                                  | 20 | CTGTGCTATTGATGAAAATG    | 38  | 63,3                 | -10,72          | -9,53            | -1,19               | 295                                       | 272                                        | 23                                            | 78                    |    | 1 |
|                                  | 19 | TGTGCTATTGATGAAAATG     | 35  | 60,4                 | -9,19           | -8,00            | -1,19               | 256                                       | 146                                        | 110                                           | -                     |    |   |
|                                  | 18 | GTGCTATTGATGAAAATG      | 32  | 57,9                 | -7,98           | -6,79            | -1,19               | 144                                       | 39                                         | 105                                           | -                     |    |   |
|                                  | 17 | TGCTATTGATGAAAATG       | 33  | 57,6                 | -7,87           | -6,68            | -1,19               | 132                                       | 34                                         | 98                                            | -                     |    |   |
|                                  | 16 | GCTATTGATGAAAATG        | 29  | 54,3                 | -6,57           | -5,38            | -1,19               | 29                                        | 5                                          | 24                                            | -                     |    |   |
|                                  | 15 | CTATTGATGAAAATG         | 31  | 53,4                 | -6,18           | -5,09            | -1,09               | 17                                        | 3                                          | 14                                            | -                     |    |   |

|                                  |    |                         |    |      |        |        |       |     |     |    |    |  |   |
|----------------------------------|----|-------------------------|----|------|--------|--------|-------|-----|-----|----|----|--|---|
| Seq.E<br>2071 RA<br>-<br>DYS 437 | 23 | AGGCTGTGCTATTGATGAAAATA | 35 | 65,2 | -11,90 | -11,77 | -0,13 | 299 | 299 | 0  | 77 |  | 1 |
|                                  | 22 | GGCTGTGCTATTGATGAAAATA  | 36 | 63,6 | -10,97 | -10,83 | -0,14 | 296 | 296 | 1  | -  |  |   |
|                                  | 21 | GCTGTGCTATTGATGAAAATA   | 33 | 61,2 | -9,62  | -9,49  | -0,13 | 275 | 270 | 5  | -  |  |   |
|                                  | 20 | CTGTGCTATTGATGAAAATA    | 30 | 58,1 | -8,09  | -7,96  | -0,13 | 157 | 142 | 15 | 91 |  | 1 |
|                                  | 19 | TGTGCTATTGATGAAAATA     | 26 | 55,5 | -6,88  | -6,74  | -0,14 | 44  | 37  | 7  | -  |  |   |
|                                  | 18 | GTGCTATTGATGAAAATA      | 28 | 55,1 | -6,77  | -6,64  | -0,13 | 38  | 32  | 6  | -  |  |   |
|                                  | 17 | TGCTATTGATGAAAATA       | 24 | 51,4 | -5,47  | -5,34  | -0,13 | 6   | 5   | 1  | -  |  |   |
|                                  | 16 | GCTATTGATGAAAATA        | 25 | 50,5 | -5,08  | -5,04  | -0,04 | 3   | 3   | 0  | -  |  |   |

|                                  |    |                       |    |      |        |        |       |     |     |    |    |   |   |
|----------------------------------|----|-----------------------|----|------|--------|--------|-------|-----|-----|----|----|---|---|
| Seq.F<br>4204 FG<br>-<br>DYS 437 | 20 | GGTCTTCCTCTGTTCCCTCAG | 55 | 66   | -11,83 | -11,12 | -0,71 | 266 | 219 | 48 | 49 | 1 | 2 |
|                                  | 19 | GTCTTCCTCTGTTCCCTCAG  | 53 | 63,5 | -10,53 | -9,82  | -0,71 | 262 | 210 | 52 | -  |   |   |
|                                  | 18 | TCTTCCTCTGTTCCCTCAG   | 50 | 61,7 | -9,55  | -8,84  | -0,71 | 245 | 181 | 64 | -  |   |   |
|                                  | 17 | CTTCCTCTGTTCCCTCAG    | 53 | 62   | -9,66  | -8,95  | -0,71 | 249 | 186 | 62 | 67 | 2 | 4 |
|                                  | 16 | TTCCTCTGTTCCCTCAG     | 50 | 57,5 | -7,84  | -7,23  | -0,61 | 122 | 64  | 58 | -  |   |   |
|                                  | 15 | TCCTCTGTTCCCTCAG      | 53 | 57,6 | -7,89  | -7,28  | -0,61 | 127 | 67  | 59 | -  |   |   |
|                                  | 14 | CCTCTGTTCCCTCAG       | 57 | 58   | -8,02  | -7,42  | -0,60 | 140 | 78  | 62 | -  |   |   |
|                                  | 13 | CTCTGTTCCCTCAG        | 54 | 52,3 | -6,19  | -5,58  | -0,61 | 17  | 7   | 10 | -  |   |   |

|                                  |    |                       |    |      |        |        |       |     |     |    |    |   |   |
|----------------------------------|----|-----------------------|----|------|--------|--------|-------|-----|-----|----|----|---|---|
| Seq.F<br>4204 FC<br>-<br>DYS 437 | 20 | GGTCTTCCTCTGTTCCCTCAC | 55 | 65,9 | -11,79 | -10,96 | -0,83 | 289 | 264 | 25 | 88 | 4 | 2 |
|                                  | 19 | GTCTTCCTCTGTTCCCTCAC  | 53 | 63,4 | -10,49 | -9,66  | -0,83 | 283 | 249 | 35 | -  |   |   |
|                                  | 18 | TCTTCCTCTGTTCCCTCAC   | 50 | 61,6 | -9,51  | -8,68  | -0,83 | 263 | 200 | 63 | -  |   |   |
|                                  | 17 | CTTCCTCTGTTCCCTCAC    | 53 | 61,9 | -9,62  | -8,79  | -0,83 | 267 | 208 | 58 | 98 | 1 | 2 |
|                                  | 16 | TTCCTCTGTTCCCTCAC     | 50 | 57,4 | -7,80  | -7,07  | -0,73 | 122 | 55  | 67 | -  |   |   |
|                                  | 15 | TCCTCTGTTCCCTCAC      | 53 | 57,5 | -7,85  | -7,12  | -0,73 | 127 | 59  | 69 | -  |   |   |
|                                  | 14 | CCTCTGTTCCCTCAC       | 57 | 57,9 | -7,99  | -7,26  | -0,73 | 142 | 69  | 74 | -  |   |   |
|                                  | 13 | CTCTGTTCCCTCAC        | 54 | 52,2 | -6,16  | -5,43  | -0,73 | 16  | 6   | 11 | -  |   |   |
